# Supplementary material for: Human iPSC-derived cerebral organoids model features of Leigh syndrome and reveal abnormal corticogenesis
Source: PubMed Central journal article supplement (PMC9357378; doi:10.1242/dev.199914), 2022-07-06
Supplement: develop-149-199914-s1.pdf [file develop-149-199914-s1.pdf]

Supplemental Figure 1

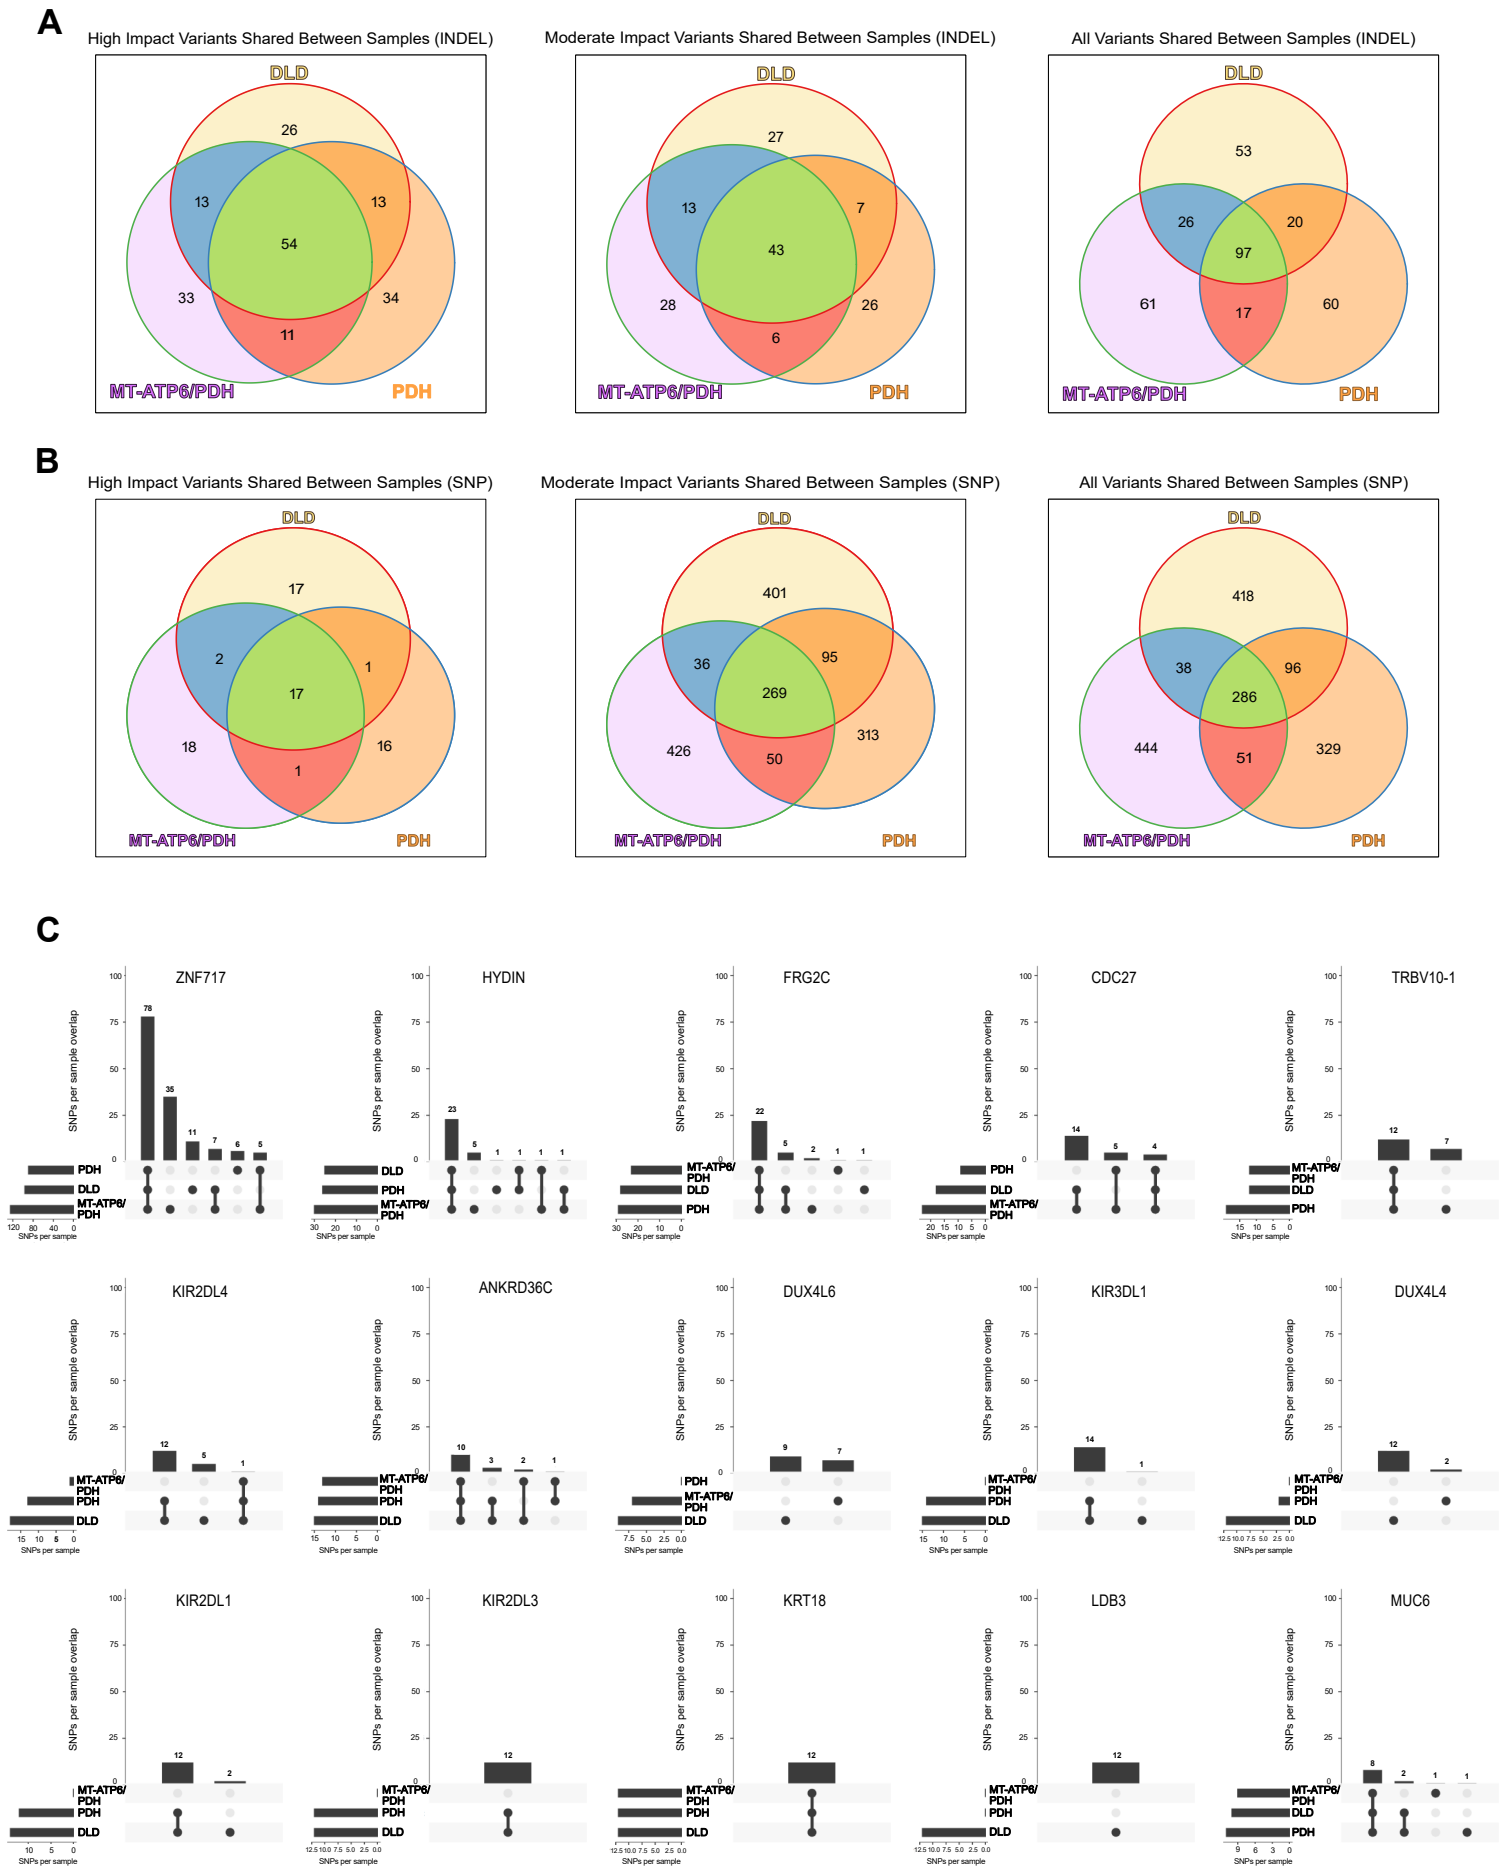

**Fig. S1. Related to Fig. 1.** A-B. Venn diagram of the distribution of high, moderate and all impact annotations across samples for INDELs (A) and SNPs (B). Pie charts of the annotation distributions within samples. C. Top 15 genes with high impact SNP variants identified in the WES analysis. Number of overlapping SNPs per sample are denoted in as vertical bars, while the number of SNPs present in each phenotype are noted in the horizontal bars. *ZNF717*: Zinc finger protein 717, *HYDIN*: HYDIN axonemal central pair apparatus protein, *FRG2C*: FSHD region gene 2 family member C, *CDC27*: Cell division cycle 27, *TRBV10-1*: T cell receptor beta variable 10-1, *KIR2DL4*: Killer cell immunoglobulin like receptor, two Ig domains and long cytoplasmic tail 4, *ANKRD36C*: Ankyrin repeat domain 36C, *DUX4L6*: Double homeobox 4 like 6, *KIR3DL1*: Killer cell immunoglobulin like receptor, three Ig domains and long cytoplasmic tail 1, *DUX4L4*: Double homeobox 4 like 4, *KIR2DL1*: Killer cell immunoglobulin like receptor, two Ig domains and long cytoplasmic tail 1, *KIR2DL3*: Killer cell immunoglobulin like receptor, two Ig domains and long cytoplasmic tail 3, *KRT18*: Keratin 18, *LDB3*: LIM domain binding 3, *MUC6*: Mucin 6.

Supplemental Figure 2

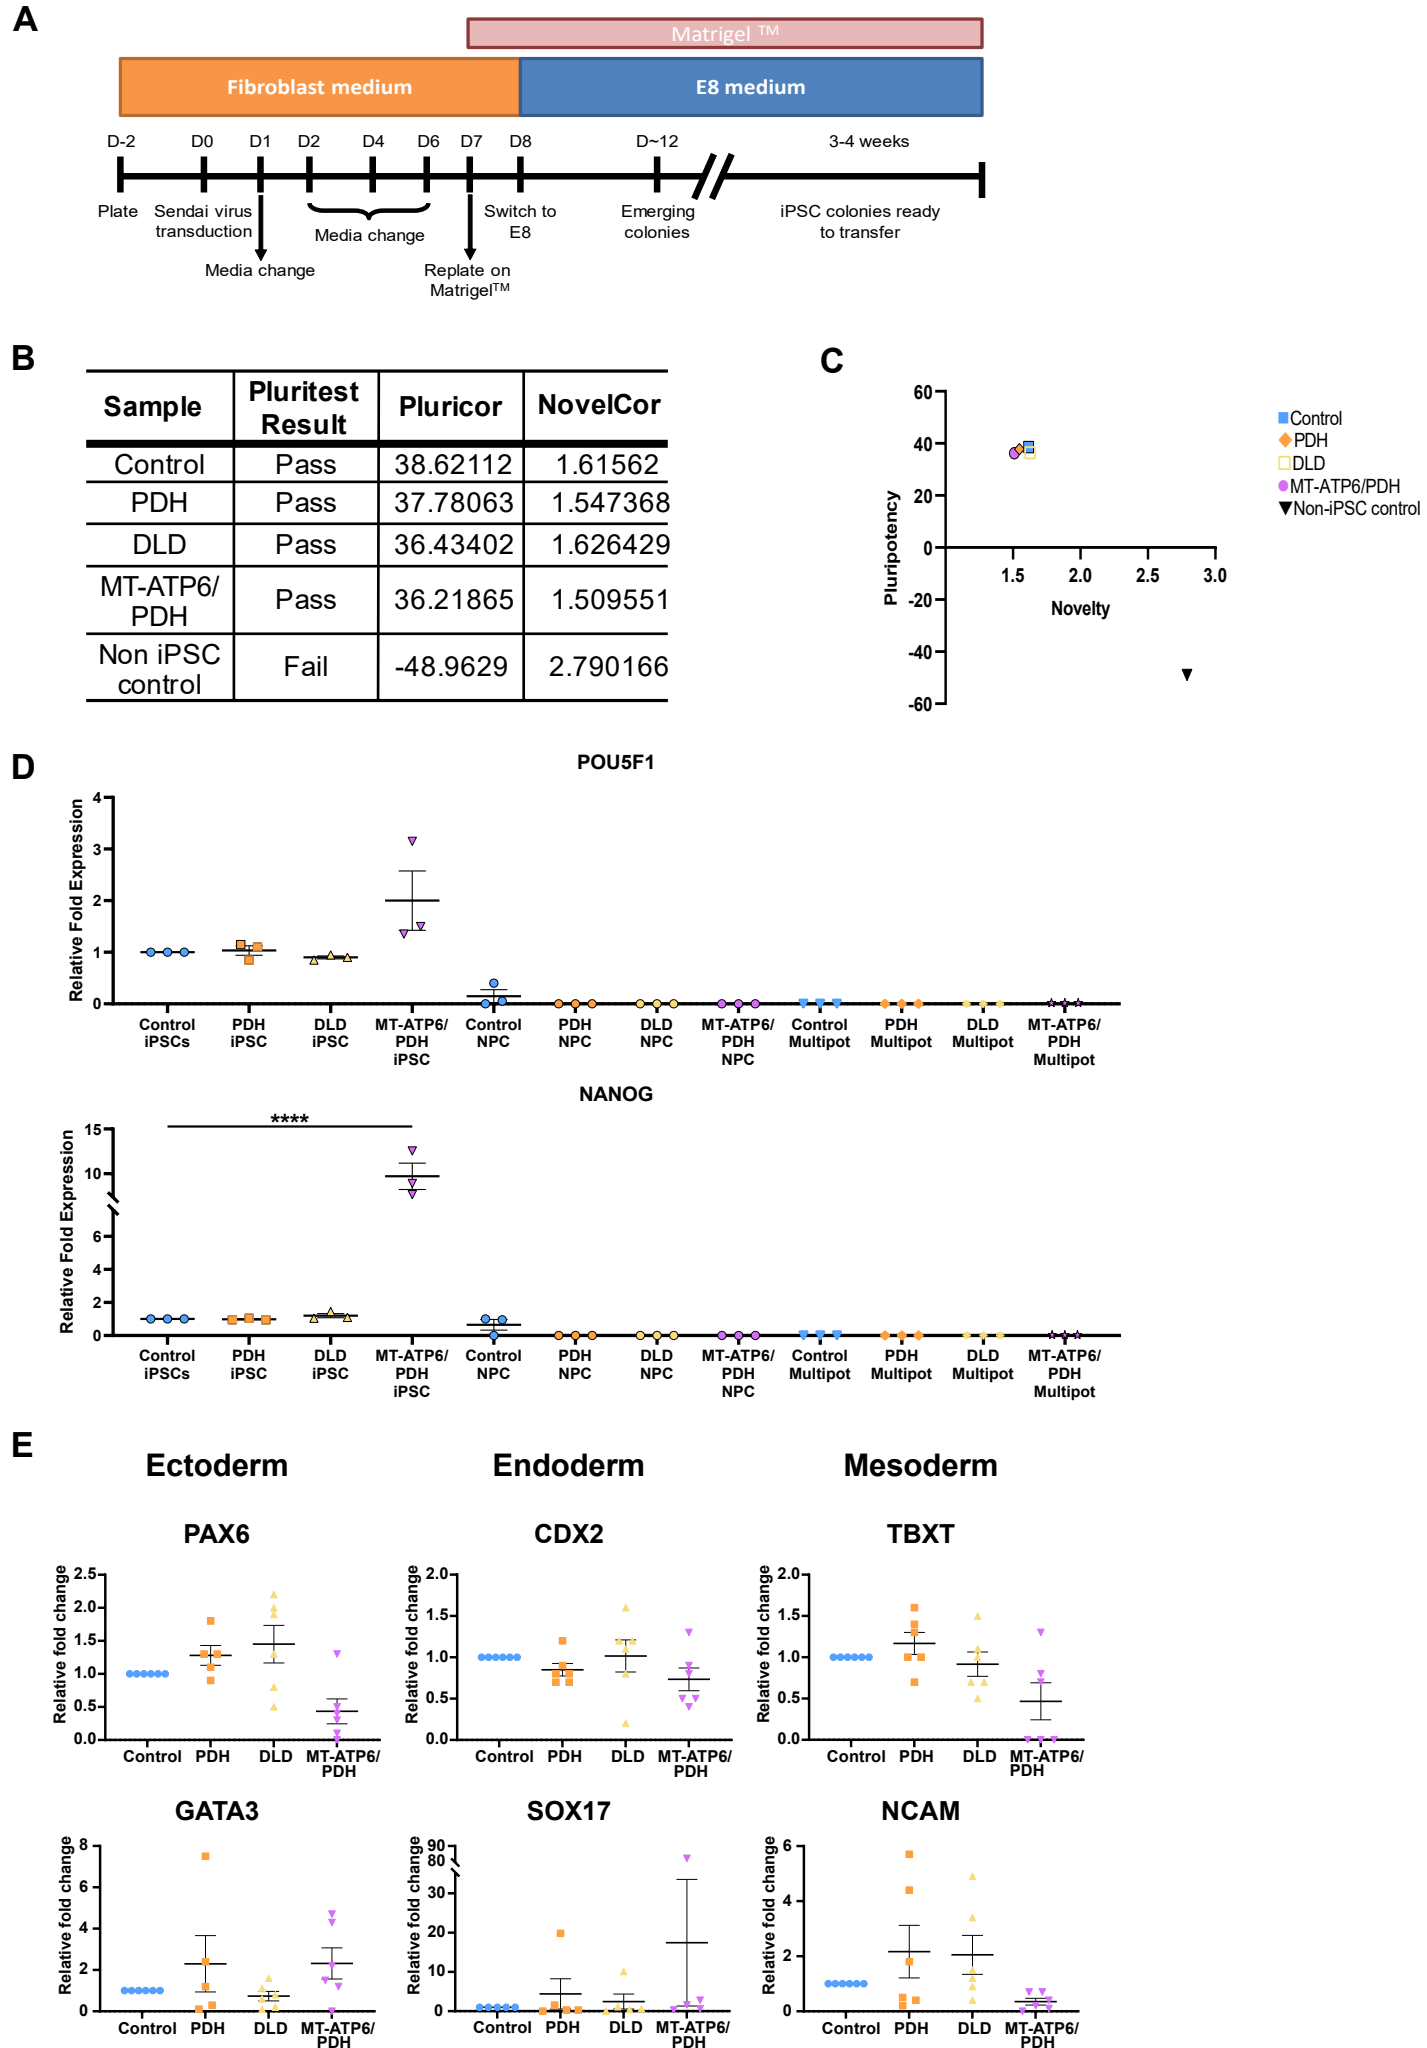

**Fig. S2.** Characterization of Leigh syndrome patient derived iPSCs. A. Schematic representation of the fibroblast reprogramming protocol. B-C. Pluripotency characterization of the LS iPSCs. Samples were analyzed against samples in a reference data set (The International Stem Cell Initiative, 2018) (B). The distribution of the samples compared with a non-iPSC control shows clustering of the samples in the high pluripotency and low novelty quadrant (C). D. qPCR for the pluripotency genes *POU5F1* and *NANOG* ( $p < 0.001$ ). E. Induced pluripotent stem cells derived from Leigh syndrome patient fibroblasts are capable of differentiation into specific lineages. RT-qPCR analysis for the ectodermal genes *GATA3* and *PAX6*, ectodermal genes *CDX2* and *SOX17* the mesodermal genes *TBXT* and *NCAM*. Fold change normalized to GPI and GAPDH as house-keeping genes. iPSC: induced pluripotent stem cells, NPC: neural progenitor cells, Multipot: neural multipotency differentiation. Graphs represent mean  $\pm$  SEM from at least three independent experiments. \* $p < 0.05$  \*\* $p < 0.01$  \*\*\* $p < 0.001$  \*\*\*\* $p < 0.0001$ .



## Supplemental Figure 3

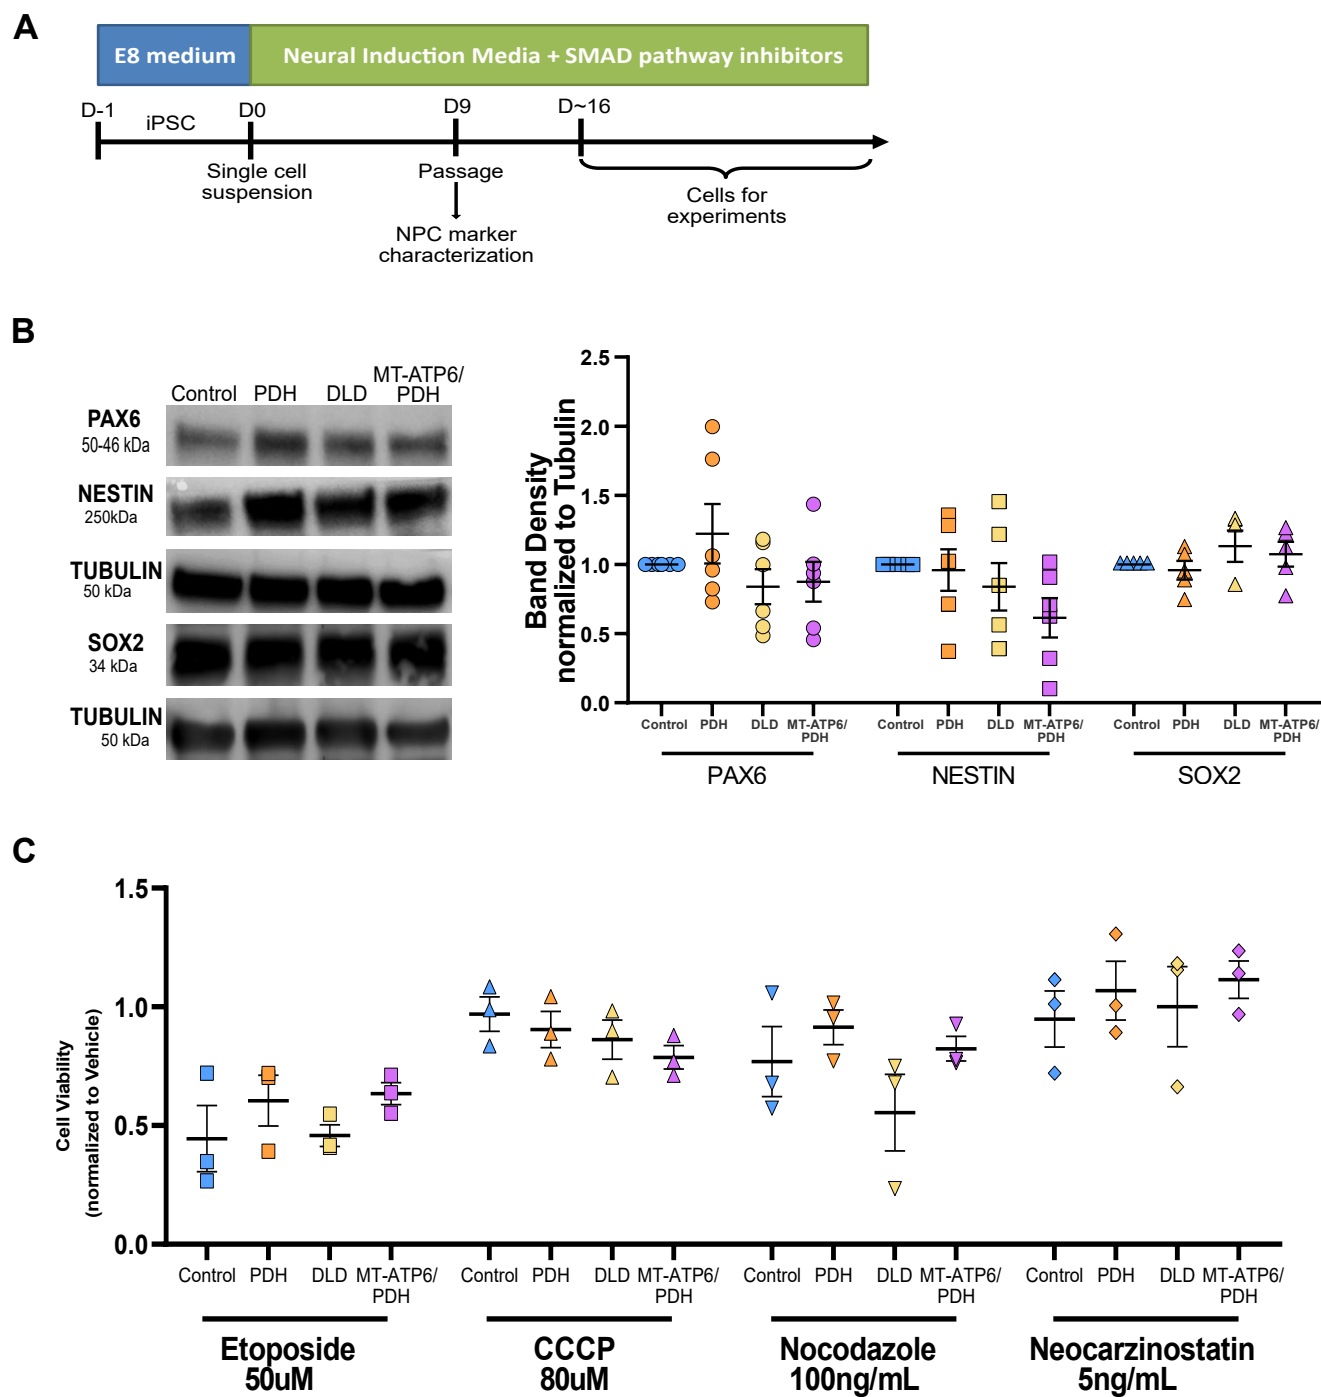

**Fig. S3.** Related to Fig. 2. Leigh syndrome patient derived NPCs are multipotent and do not present increased sensitivity to pharmacological stressors. A. Schematic of two-dimensional neural differentiation. B. Immunoblot of protein expression of neural markers PAX6, NESTIN, and SOX2 (Left). Quantification of protein expression of neural markers PAX6, NESTIN and SOX2. Band density normalized to TUBULIN as a loading control (Right). C. Leigh syndrome NPCs do not show enhanced sensitivity towards different stressors. LS NPCs have similar cell viability when exposed to the DNA damaging agents etoposide and neocarzinostatin, the mitochondrial toxicant CCCP, and the microtubule destabilizer nocodazole.

Supplemental Figure 4

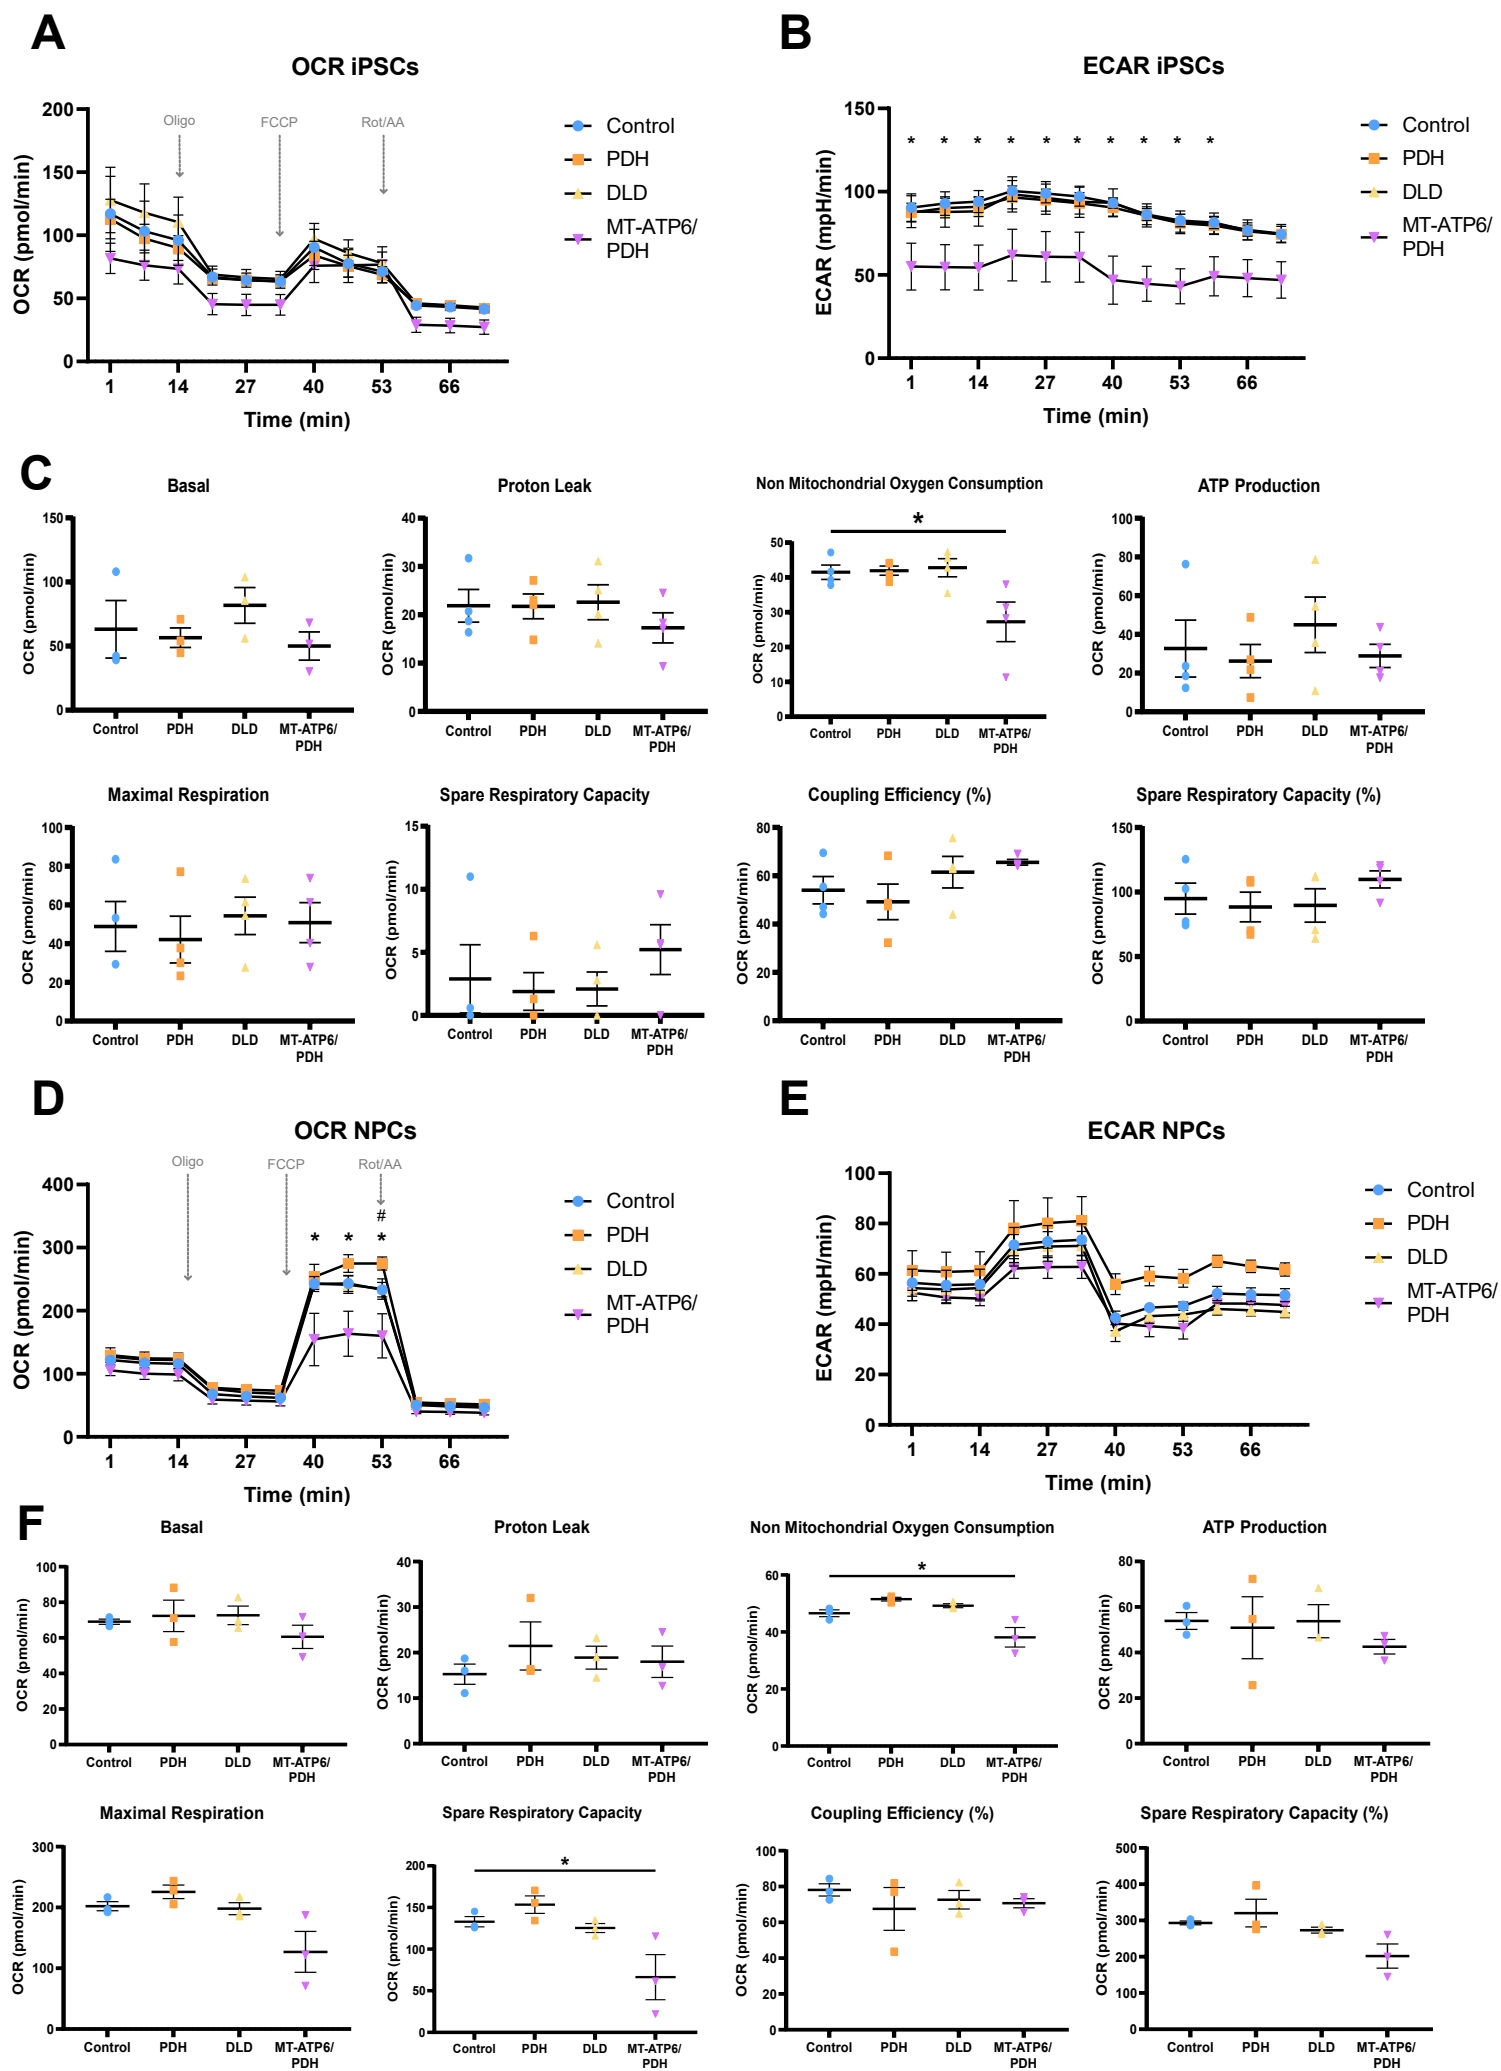

**Fig. S4.** Bioenergetic profile of LS patient derived iPSCs and NPCs. A. Analysis of oxygen consumption rate (OCR) in control and LS patient derived iPSCs. B. Extra cellular acidification rate (ECAR) for control and LS patient derived iPSCs. MT-ATP6/PDH iPSCs show reduced glycolytic capacity. C. Bioenergetic parameters for LS and control iPSCs. MT-ATP6/PDH derived iPSCs presented with reduced non-mitochondrial oxygen consumption compared to control ( $p=0.0284$ ). D. Analysis of oxygen consumption in control and LS patient derived NPCs. MT-ATP6/PDH derived NPCs are deficient in OXPHOS energy generation compared to control. E. Extra cellular acidification rate (ECAR) for control and LS patient derived NPCs. F. Bioenergetic parameters for LS and control NPCs. MT-ATP6/PDH NPCs have reduced non-mitochondrial oxygen consumption ( $p=0.0354$ ) and spare respiratory capacity when compared to control ( $p=0.0317$ ). Graphs represent mean  $\pm$  SEM from at least three independent experiments. \* $p<0.05$ ; \*\* $p<0.01$ ; \*\*\* $p<0.001$ ; \*\*\*\* $p<0.0001$ .

Supplemental Figure 5

**A**

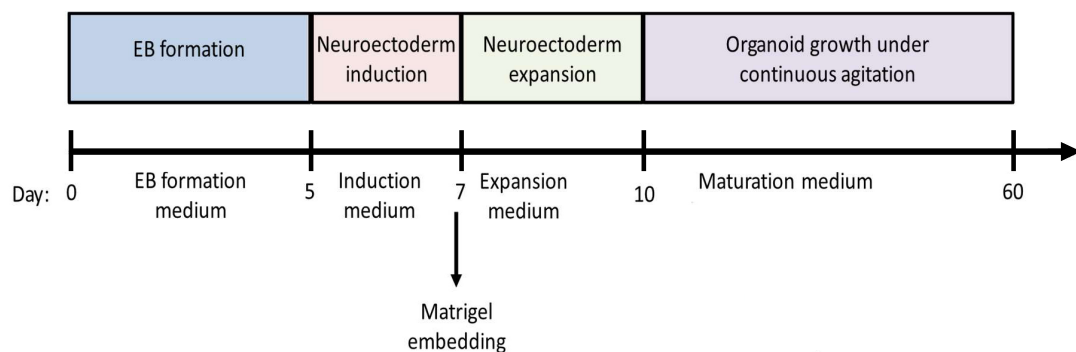

**B**

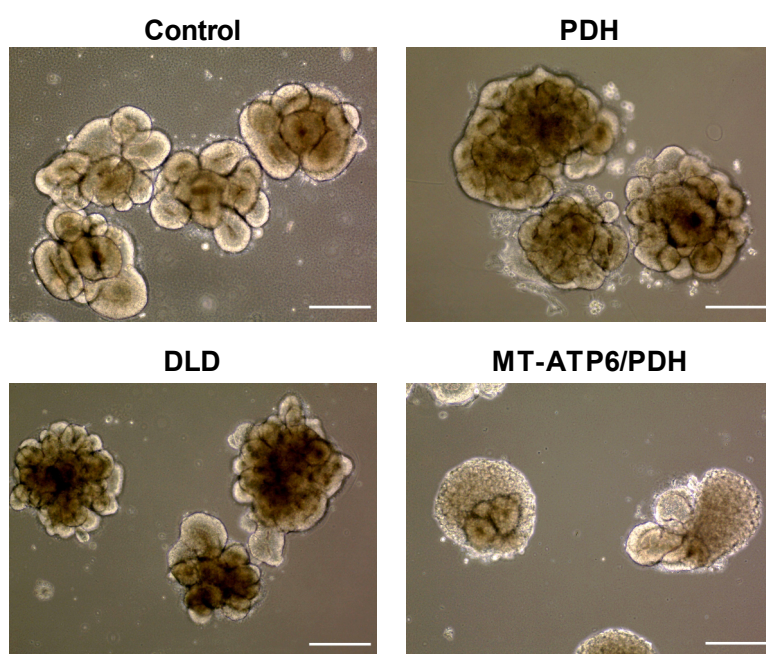

**C**

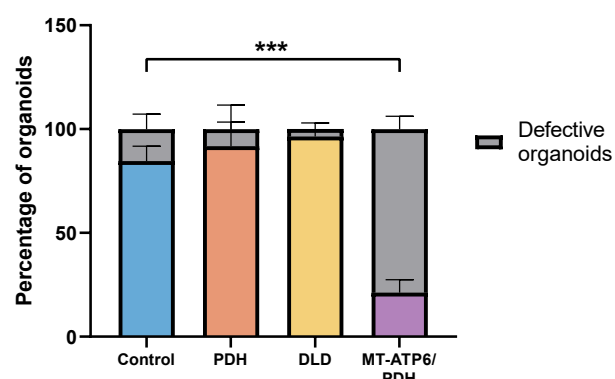

**D**

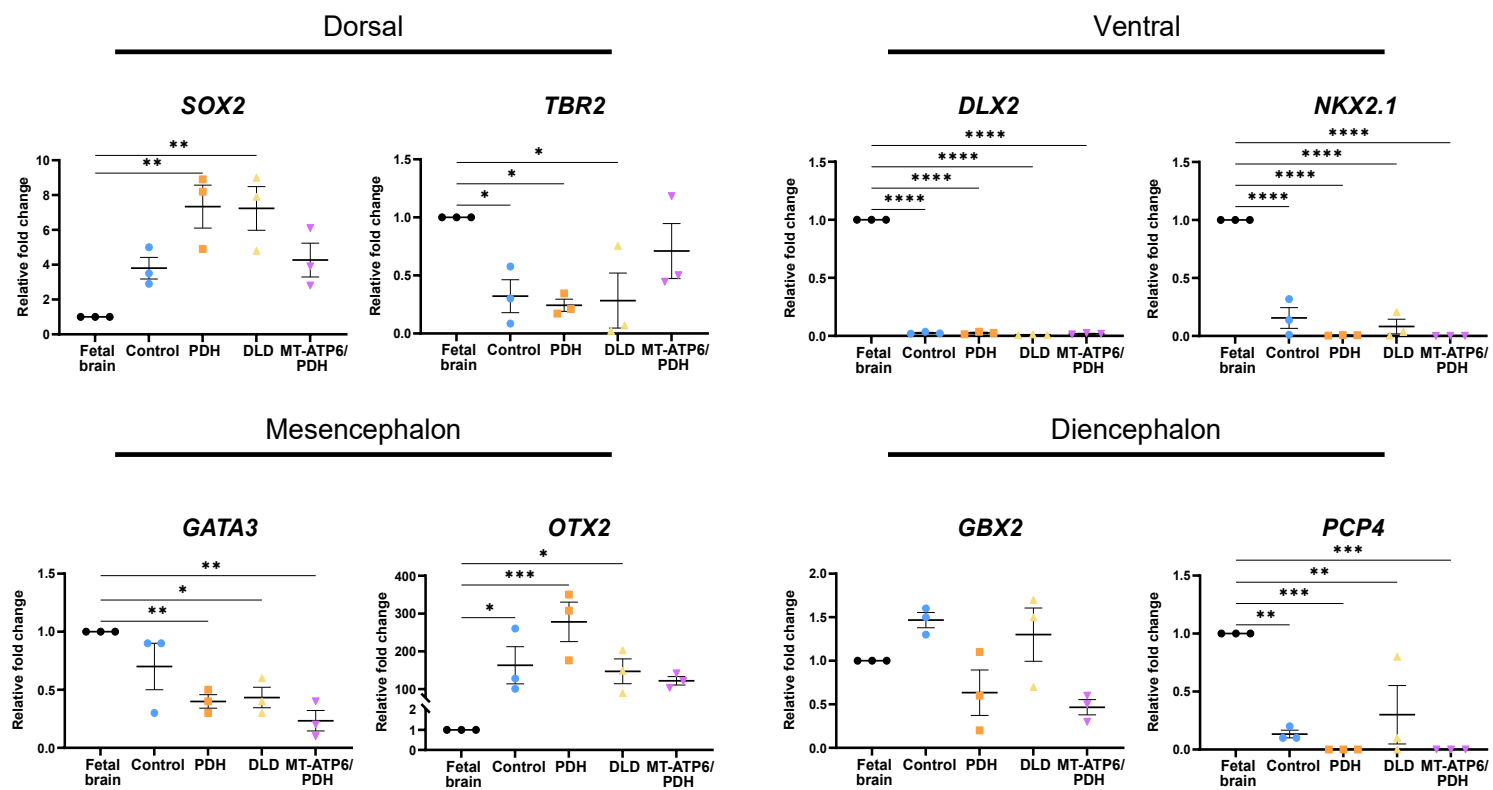

**Fig. S5.** MT-ATP6/PDH brain organoids display defective differentiation at day 10. A. Schematic of the brain organoid generation protocol. B. Brightfield images (4X) of day 10 brain organoids. MT-ATP6/PDH shows disorganized cellular growth that do not resemble neuroepithelial buds. Scale bar: 300 $\mu$ m. C. Quantification of the defective organoids at day 10 by cell line. D. Regional identity characterization of day 15 brain organoids. Forebrain (*SOX2* and *TBR2* for dorsal and *DLX2* and *NKX2.1* ventral telencephalon), diencephalon (*GBX2* and *PCP4*) and midbrain (mesencephalon, *GATA3* and *OTX2*) markers were assessed in all organoids and normalized to fetal brain RNA (20-33wks). *SOX2* expression was increased in all organoids compared to the fetal brain (PDH:  $p=0.0026$  and DLD:  $p=0.0029$ ). Expression of *TBR2* was lower in control organoids ( $p=0.0479$ ), PDH ( $p=0.0275$ ), and DLD ( $p=0.0366$ ). Expression of ventral markers *DLX2* and *NKX2.1* were expressed in very low values compared to fetal brain RNA ( $p<0.0001$  in all cases). The early marker for mesencephalic fate *GATA3* was reduced in all three LS organoids (PDH:  $p=0.0096$ , DLD:  $p=0.0136$ , MT-ATP6/PDH  $p=0.0019$ ). *OTX2* expression was upregulated in the control ( $p=0.0295$ ), PDH ( $p=0.0009$ ) and DLD ( $p=0.0494$ ) organoids when compared to the fetal brain RNA expression. The diencephalon marker *GBX2* was expressed similarly among all genotypes, whereas *PCP4* was lower in all genotypes (control:  $p=0.0010$ , PDH:  $p=0.0003$ , DLD:  $p=0.0048$ , MT-ATP6/PDH:  $p=0.0003$ ). Fold change normalized to *GPI* and *GAPDH* as house-keeping genes. Graphs represent mean  $\pm$  SEM from three independent experiments. \* $p<0.05$ ; \*\* $p<0.01$ ; \*\*\* $p<0.001$ ; \*\*\*\* $p<0.0001$ .



Supplemental Figure 6

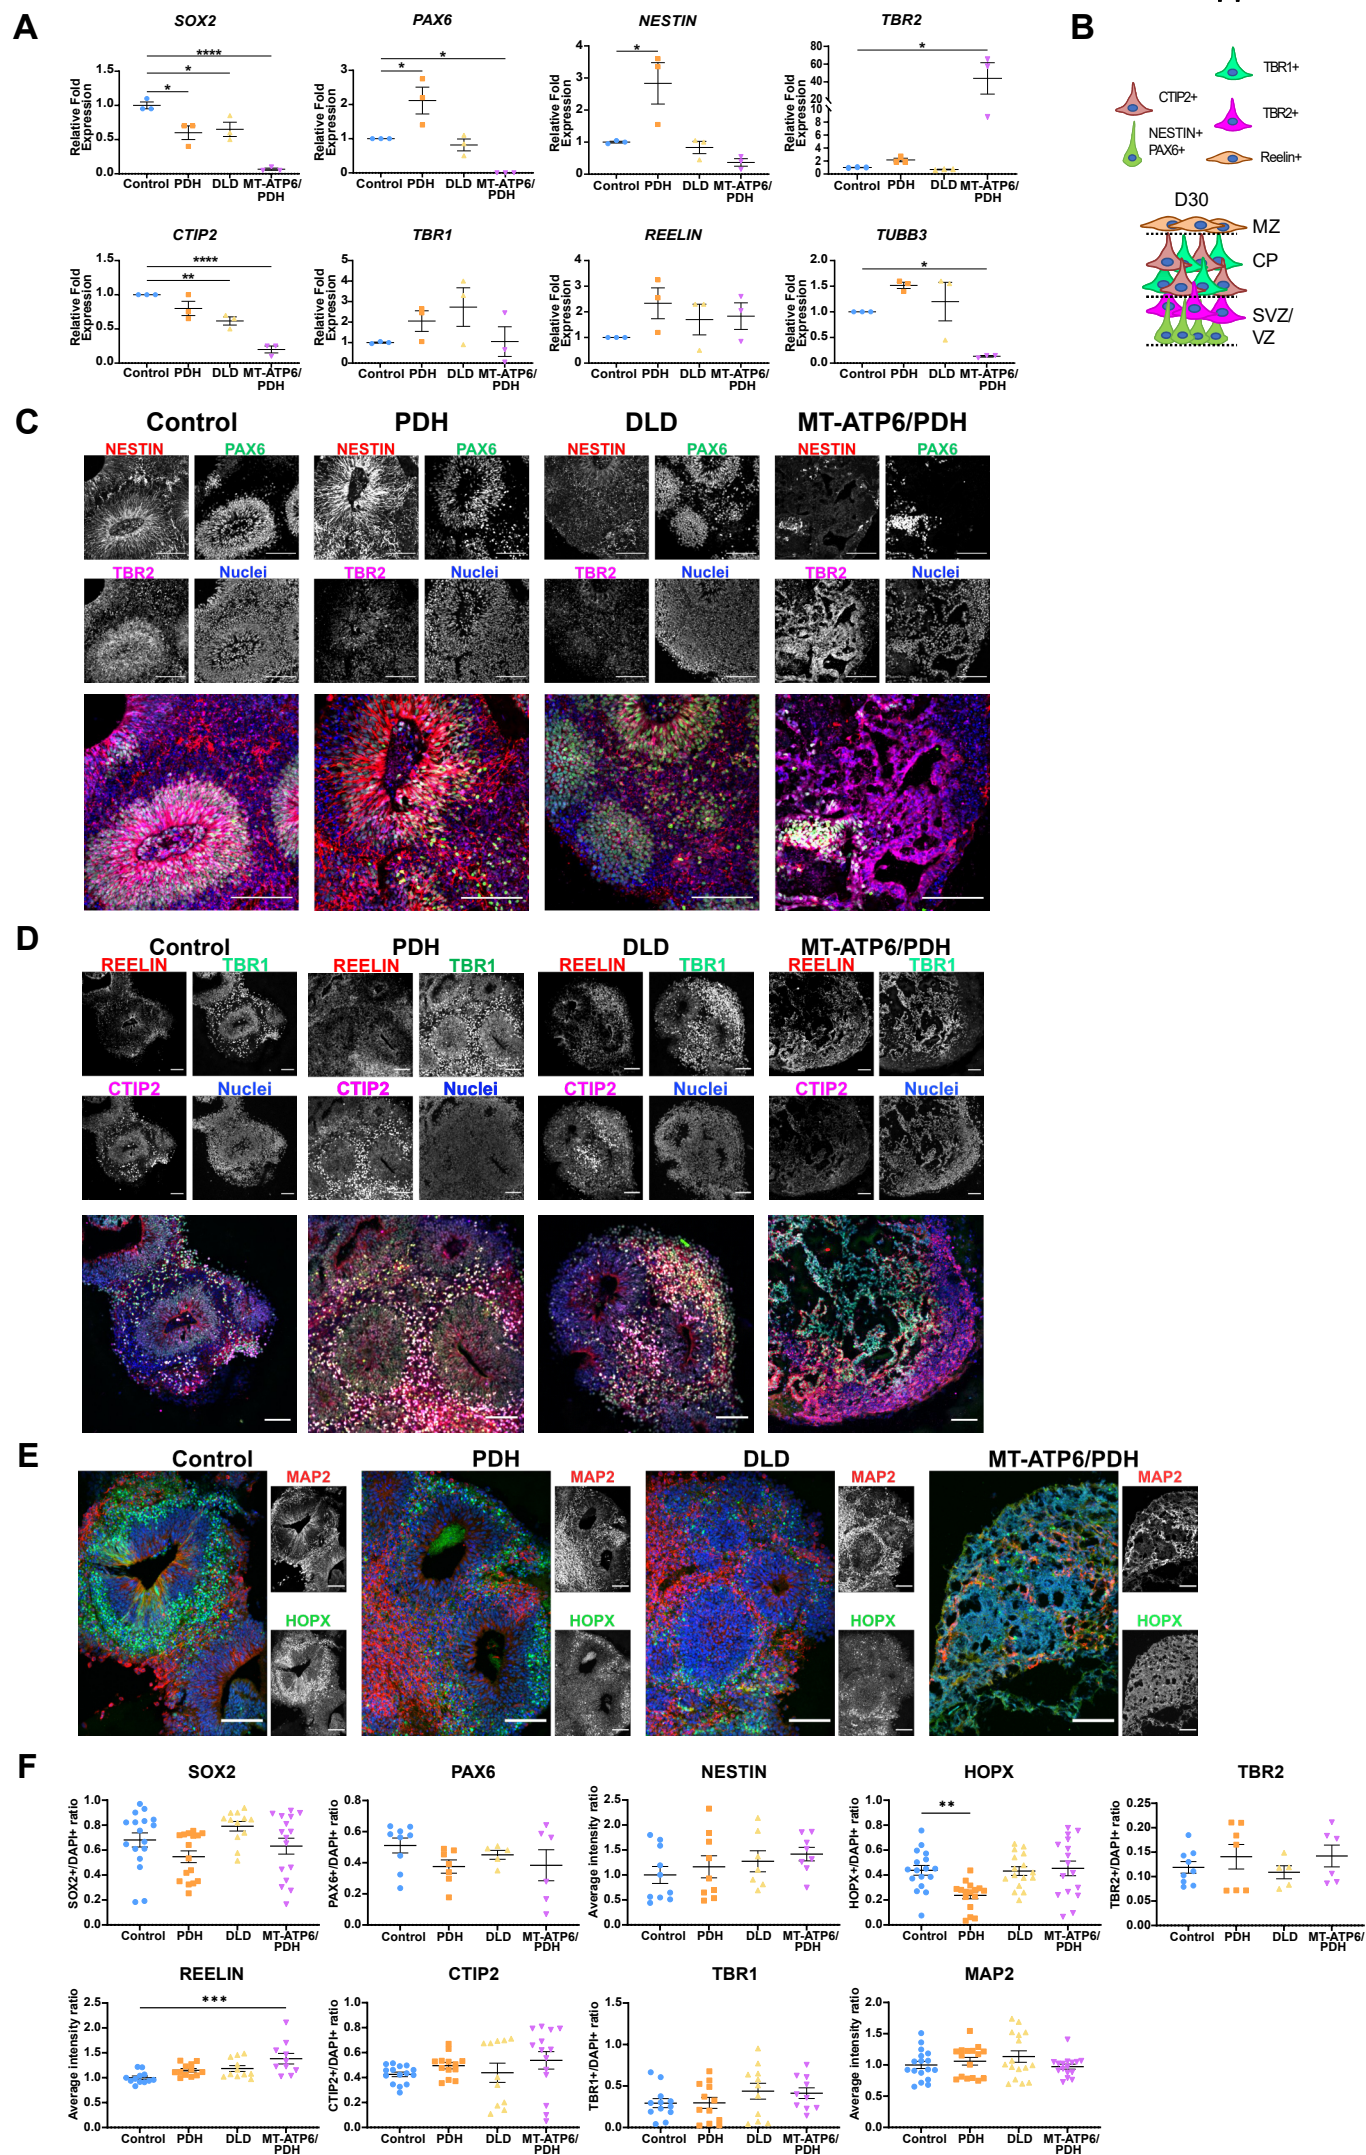

**Fig. S6.** Leigh syndrome brain organoids show defects in SVZ/VZ and CP formation. A. qPCR quantification of the day 30 organoids. Neural progenitor cell populations were evaluated by the expression of *SOX2*, *PAX6* and *NESTIN*. Intermediate progenitor cells were identified with the marker *TBR2*. Marginal zone marker *REELIN*, cortical plate markers *TBR1* and *CTIP2*, and neuronal marker *TUBB3* were also evaluated. Fold change normalized to GPI and GAPDH as house-keeping genes. B. Schematic representation of the expected organization of the brain organoids on day 30. C-E. Representative immunostaining confocal images of day 30 brain organoids. MT-ATP6/PDH mutant presents severe disorganization of the SVZ/VZ markers *PAX6* and *TBR2*, as well as the neural progenitor marker *NESTIN* (C). Cajal-Retzius neurons positive for *REELIN* were observed in the surface of the organoids (D). Cortical plate markers *CTIP2* and *TBR1* (D), as well as outer radial glia marker *HOPX* and the neuronal marker *MAP2* (E). For E, nuclei in merge image correspond to the blue channel. Scale bar: 100µm. Images were generated from at least three different organoids per genotype from 3 independent organoid batches. F. Quantification of day immunofluorescence staining for day 30 brain organoids. Outer radial glia marker *HOPX* was reduced in PDH organoids ( $p=0.0032$ ) and MZ marker *Reelin* was increased ( $p=0.0002$ ) in MT-ATP6/PDH mutant organoids. SVZ: subventricular zone, VZ: ventricular zone, CP: cortical plate, MZ: marginal zone. \* $p<0.05$ ; \*\* $p<0.01$ ; \*\*\* $p<0.001$ ; \*\*\*\* $p<0.0001$ .

Supplemental Figure 7

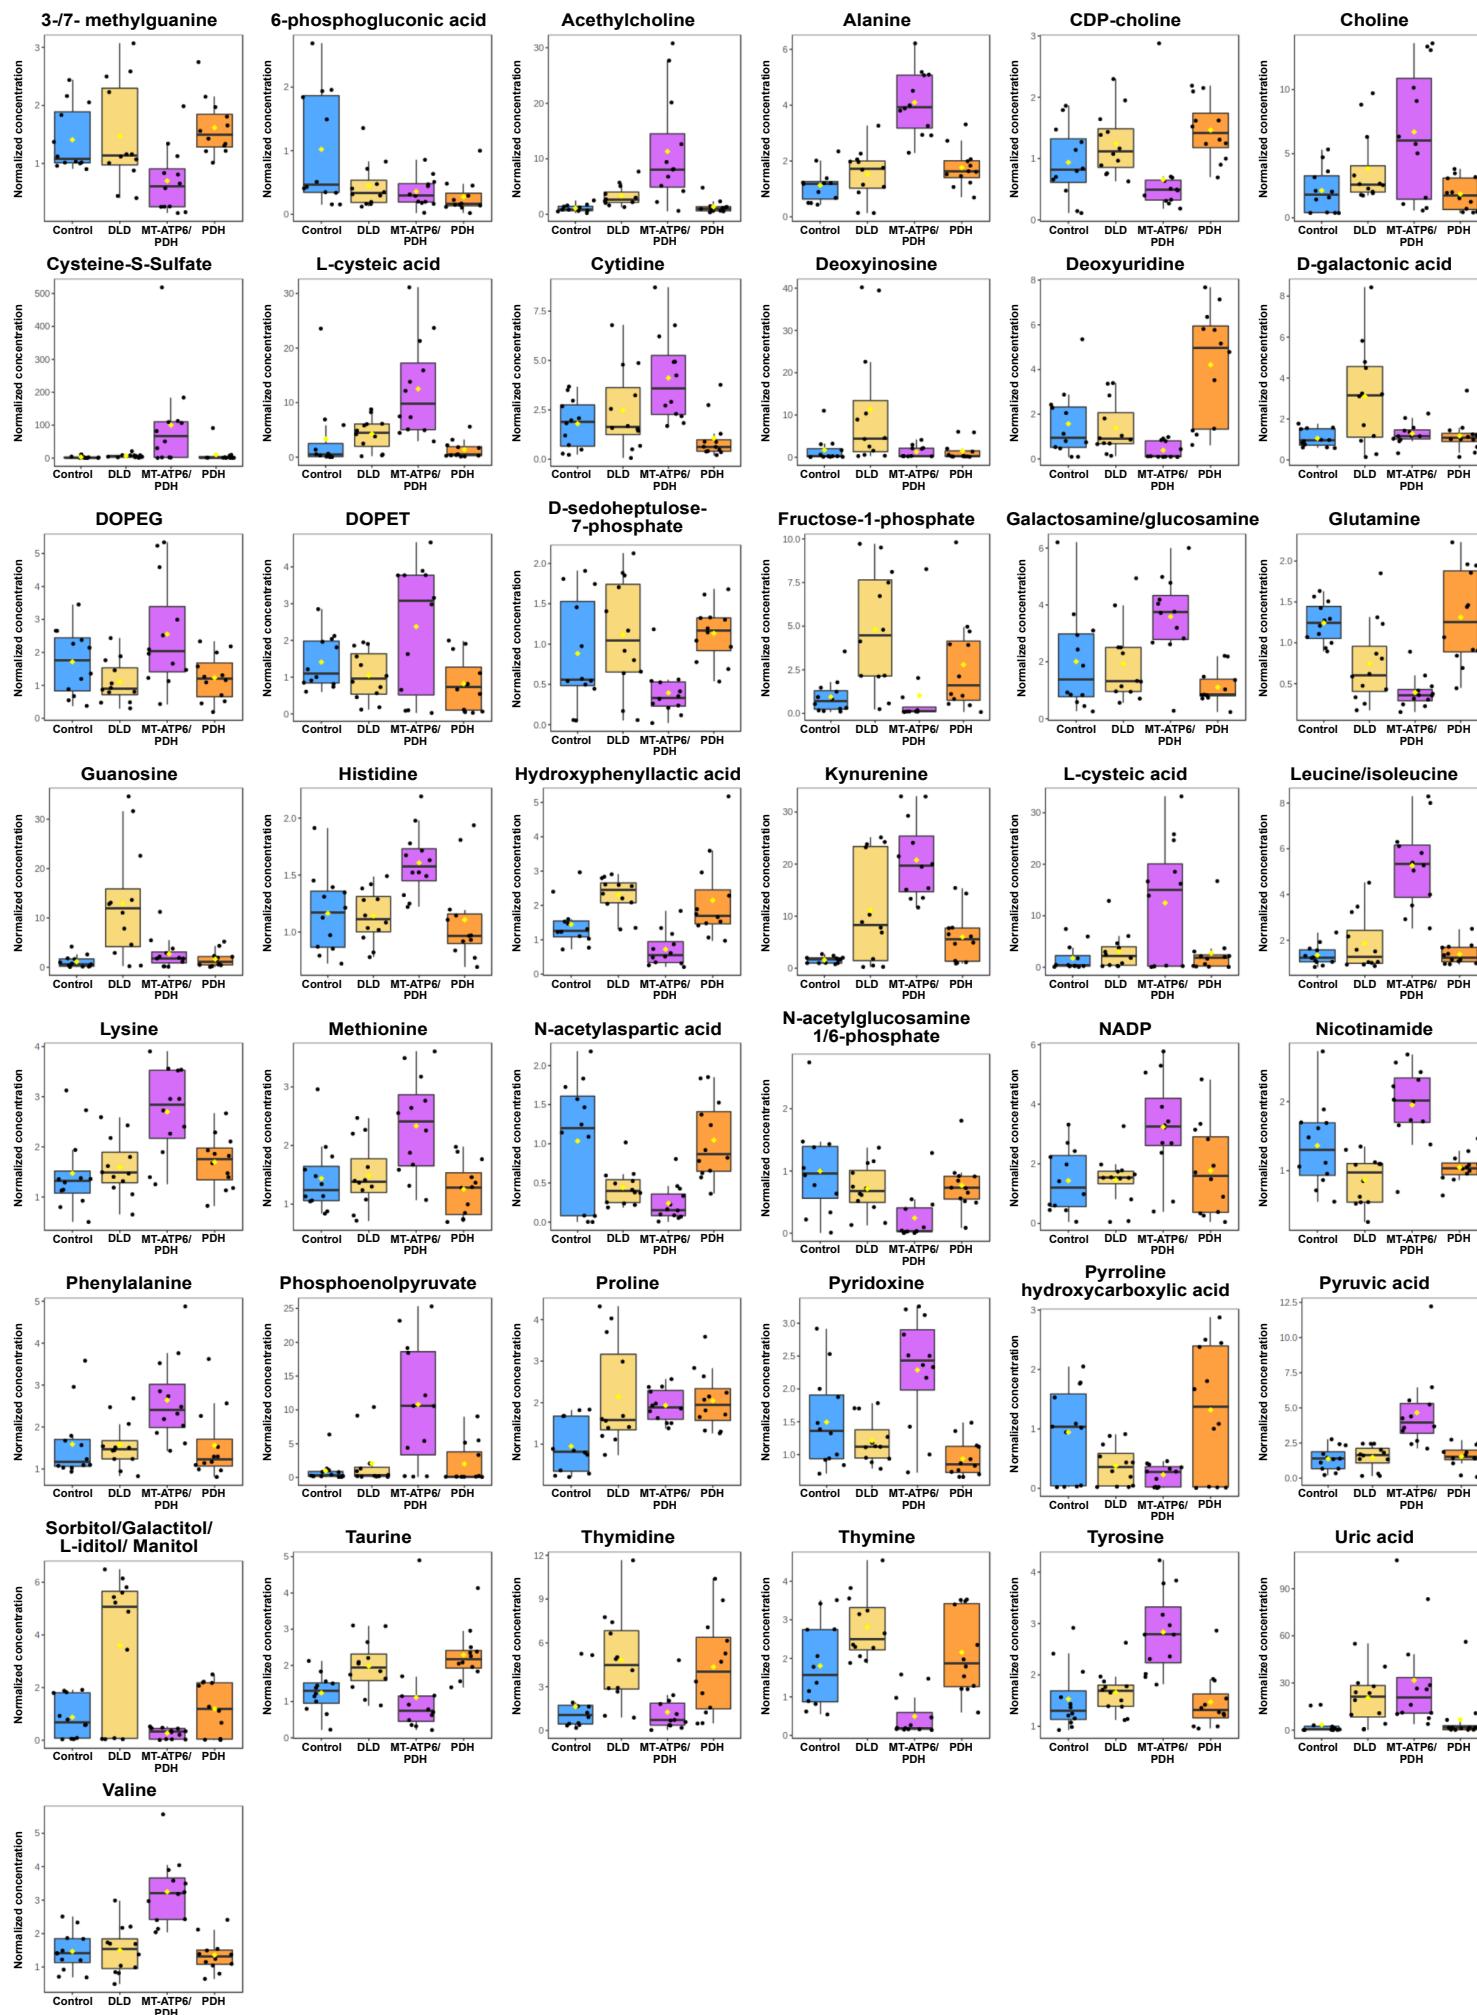



**Fig. S7. Related to Fig. 7 and Table S2.** Day 40 LS organoids show changes in their metabolic profiles. Individual graph bars for the 43 metabolites identified as statistically dysregulated ( $p < 0.05$  and FDR of 0.01) in LS Organoids when compared to control. Statistical values can be found in Supplemental Table 2. A total of three batches of 40-day organoids per line (4 independent organoids per line per batch) were analyzed as described in methods.

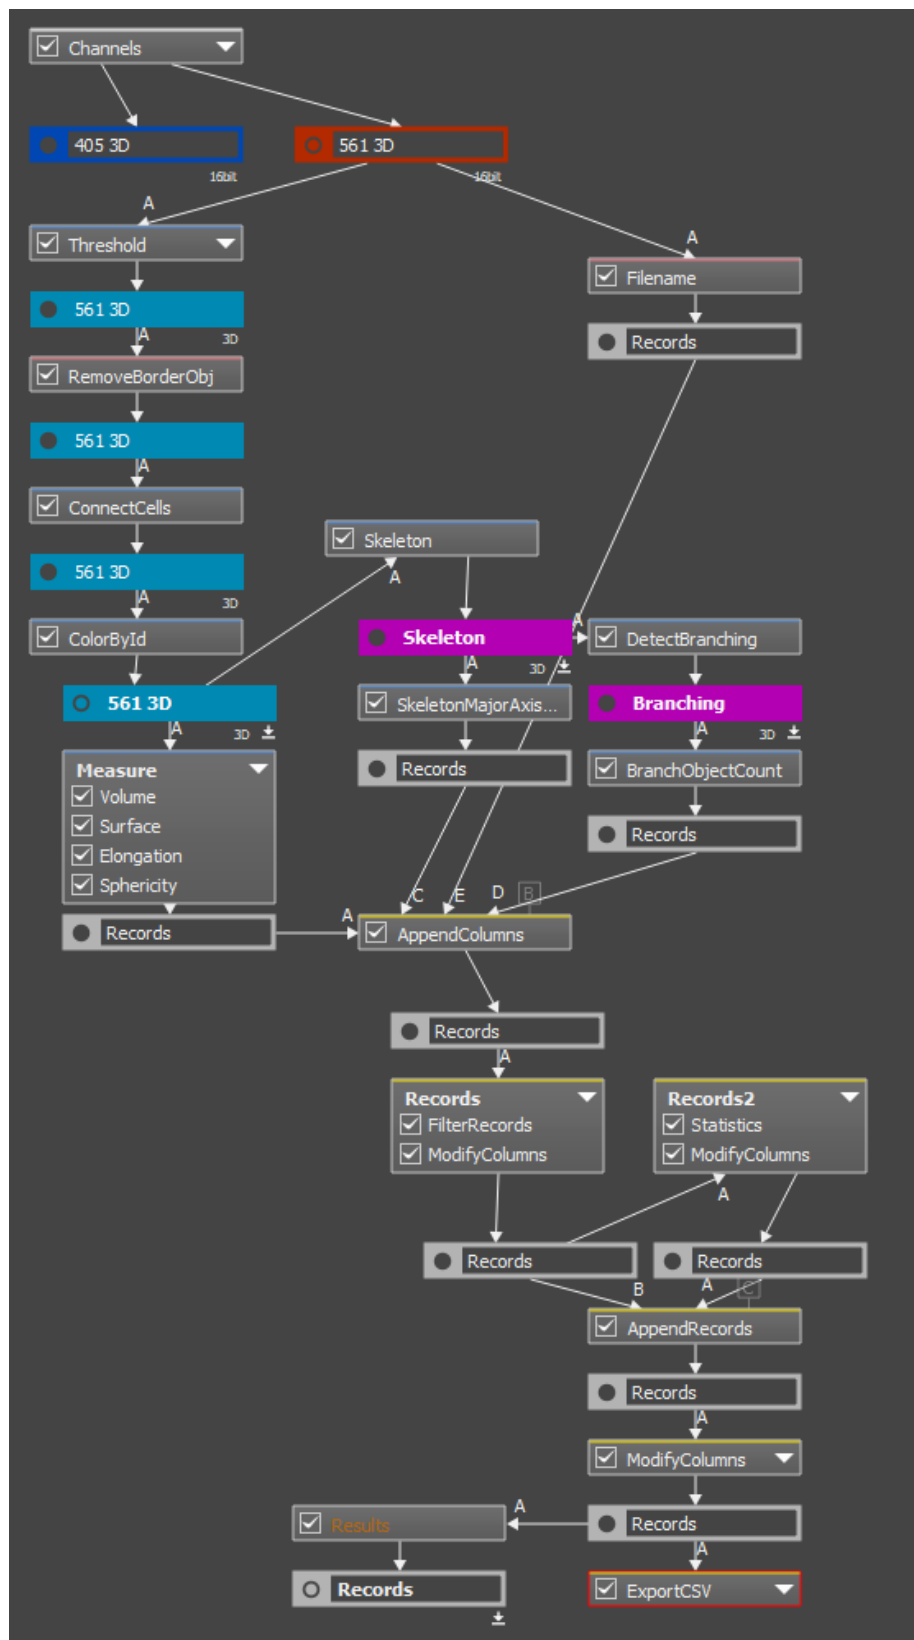

Fig. S8. Monolayer NPC mitochondrial quantification workflow.

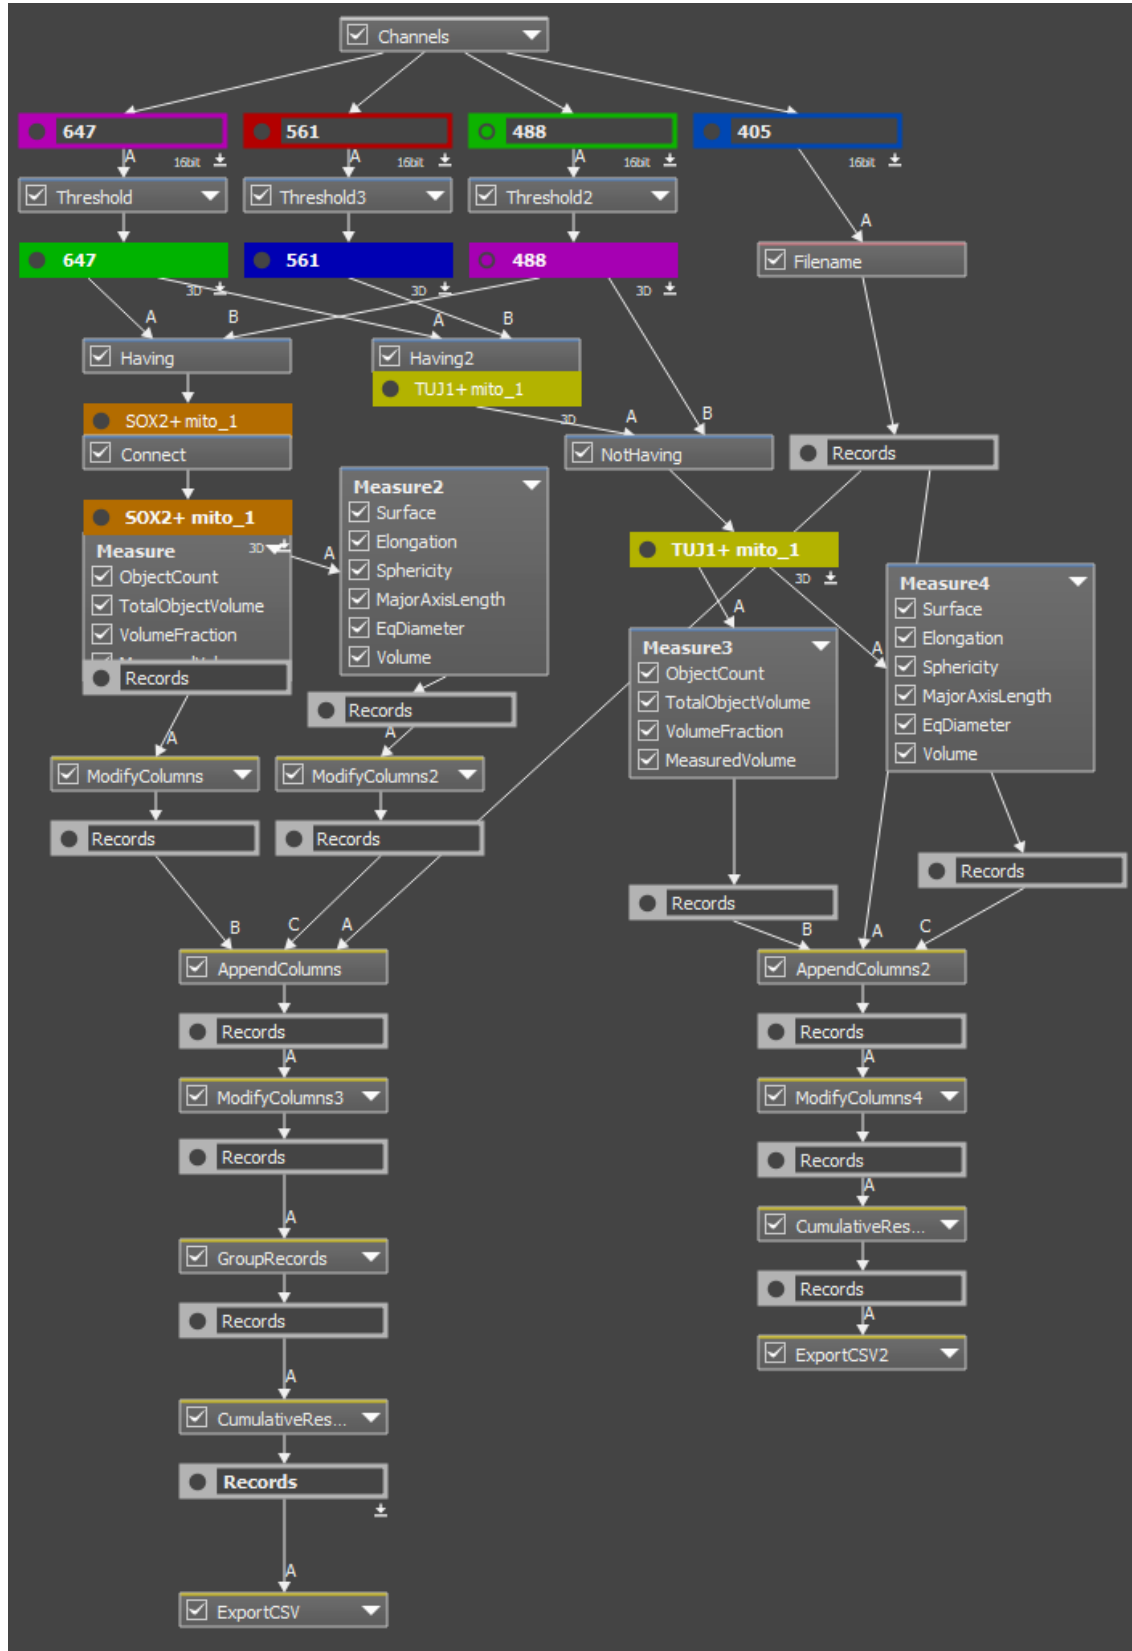

Fig. S9. Organoid NPC mitochondrial quantification workflow

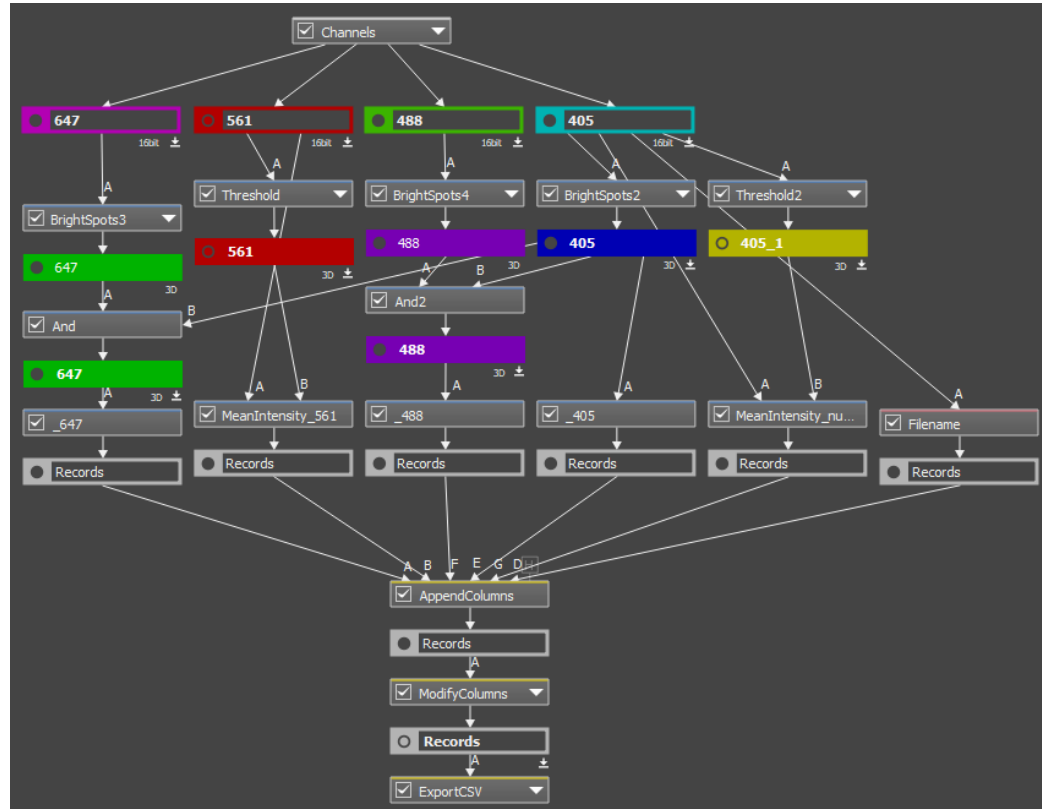

Fig. S10. Organoid quantification workflow for GA3, NIS Elements.

**Table S1. Related to Fig. 1.** Summary characteristics of the Leigh syndrome patient derived fibroblast cell lines including the patient phenotype at diagnosis, the mutations identified, and published literature using the cell line.

| Cell line | Phenotype                                                                                                                                                                        | Mutation                                                                                      | References                                                                                                                                          |
|-----------|----------------------------------------------------------------------------------------------------------------------------------------------------------------------------------|-----------------------------------------------------------------------------------------------|-----------------------------------------------------------------------------------------------------------------------------------------------------|
| GM03672   | 1 y/o female, Caucasian.<br>Developmental regression; microcephalic;<br>elevated blood lactic acid and pyruvate;<br>only affected family member                                  | PDH (E1) LOF<br>Pyruvate dehydrogenase<br>(79delC, Arg27fs)                                   | Hinman et al. 1989;<br>Huh et al. 1990;<br>Johnson et al. 2019                                                                                      |
| GM01503   | 3y/o female, Caucasian.<br>Lactic acidosis, psychomotor delay;<br>sister also affected.<br>Subnormal activation of pyruvate<br>dehydrogenase complex in<br>disrupted fibroblasts | DLD (E3)<br>Dihydrolipoamide<br>dehydrogenase<br>(A100G, Thr34Ala)                            | Cooper et al, 1969;<br>Murphy JV, 1973;<br>Sorbi& Blass, 1982;<br>Hinman et al. 1989;<br>Huh et al. 1990;<br>Vo et al. 2007;<br>Johnson et al. 2019 |
| GM13411   | 8 month old male, Chinese.<br>Lactic acidosis; developmental delay.<br>Hypertrophic cardiomyopathy.<br>Symmetric neural necrosis.<br>Fibroblast: 90% heteroplasmy                | MT-ATP6<br>(T8993G, Leu156Arg)<br>PDH (E1) LOF<br>Pyruvate dehydrogenase<br>(79delC, Arg27fs) | Pastores et al. 1994;<br>Iyer et al.2012;<br>Ma et al. 2014;<br>Galera-Monge et al. 2016;<br>Zheng et al. 2016;<br>Johnson et al. 2019              |

**Table S2. Related to Fig. 7 and Fig. S7.** Dysregulated metabolites in day 40 LS derived cerebral organoids. LC-MS measured metabolite peak areas were normalized to the total ion count (TIC) by sample and fold change was determined by dividing each LS TIC normalized peak area by the control TIC normalized peak area for each metabolite. One way ANOVA was utilized to identified metabolites that were significantly dysregulated ( $p < 0.05$ ). Post-hoc comparison column using Fisher's least significant difference method (Fisher's LSD) shows the comparisons between different levels that are significant given the p value threshold. Results shown are averages for 3 independent runs with 4 individual organoids per phenotype per run. FDR: False Discovery Rate.

| Metabolite                               | f.value | p.value    | -LOG10(p) | FDR        | Fisher's LSD                                                                              |
|------------------------------------------|---------|------------|-----------|------------|-------------------------------------------------------------------------------------------|
| leucine / leucineiso                     | 32.463  | 3.17E-11   | 10.499    | 7.00E-09   | MT-ATP6/PDH - Control; MT-ATP6/PDH - DLD; MT-ATP6/PDH - PDH                               |
| alanine                                  | 28.604  | 2.04E-10   | 9.6912    | 2.25E-08   | MT-ATP6/PDH - Control; MT-ATP6/PDH - DLD; MT-ATP6/PDH - PDH                               |
| valine                                   | 18.839  | 5.25E-08   | 7.2801    | 3.87E-06   | MT-ATP6/PDH - Control; MT-ATP6/PDH - DLD; MT-ATP6/PDH - PDH                               |
| kynurenine                               | 17.496  | 1.27E-07   | 6.896     | 7.02E-06   | DLD - Control; MT-ATP6/PDH - Control; MT-ATP6/PDH - DLD; MT-ATP6/PDH - PDH                |
| thymine                                  | 13.799  | 1.77E-06   | 5.7523    | 7.82E-05   | DLD - Control; Control - MT-ATP6/PDH; DLD - MT-ATP6/PDH; PDH - MT-ATP6/PDH                |
| tyrosine                                 | 13.55   | 2.14E-06   | 5.6703    | 7.87E-05   | MT-ATP6/PDH - Control; MT-ATP6/PDH - DLD; MT-ATP6/PDH - PDH                               |
| glutamine                                | 13.161  | 2.88E-06   | 5.5408    | 9.09E-05   | Control - DLD; Control - MT-ATP6/PDH; DLD - MT-ATP6/PDH; PDH - DLD; PDH - MT-ATP6/PDH     |
| pyruvic acid                             | 12.95   | 3.39E-06   | 5.4697    | 9.37E-05   | MT-ATP6/PDH - Control; MT-ATP6/PDH - DLD; MT-ATP6/PDH - PDH                               |
| nicotinamide                             | 12.723  | 4.05E-06   | 5.3925    | 9.95E-05   | Control - DLD; MT-ATP6/PDH - Control; MT-ATP6/PDH - DLD; MT-ATP6/PDH - PDH                |
| deoxyuridine                             | 12.392  | 5.26E-06   | 5.2794    | 0.00011615 | PDH - Control; PDH - DLD; PDH - MT-ATP6/PDH                                               |
| pyridoxine                               | 11.7    | 9.16E-06   | 5.0381    | 0.00018405 | MT-ATP6/PDH - Control; Control - PDH; MT-ATP6/PDH - DLD; MT-ATP6/PDH - PDH                |
| sorbitol / galactitol / L-itol / manitol | 11.289  | 1.28E-05   | 4.8919    | 0.00023619 | DLD - Control; DLD - MT-ATP6/PDH; DLD - PDH                                               |
| acetylcholine                            | 10.88   | 1.80E-05   | 4.7444    | 0.00030625 | MT-ATP6/PDH - Control; MT-ATP6/PDH - DLD; MT-ATP6/PDH - PDH                               |
| guanosine                                | 10.42   | 2.66E-05   | 4.5755    | 0.00041955 | DLD - Control; DLD - MT-ATP6/PDH; DLD - PDH                                               |
| hydroxyphenyllactic acid                 | 10.302  | 2.94E-05   | 4.5318    | 0.00043306 | DLD - Control; Control - MT-ATP6/PDH; PDH - Control; DLD - MT-ATP6/PDH; PDH - MT-ATP6/PDH |
| phosphoenolpyruvate                      | 9.3744  | 6.59E-05   | 4.1812    | 0.00091016 | MT-ATP6/PDH - Control; MT-ATP6/PDH - DLD; MT-ATP6/PDH - PDH                               |
| cystine                                  | 8.3901  | 0.00016027 | 3.7951    | 0.0020835  | MT-ATP6/PDH - Control; MT-ATP6/PDH - DLD; MT-ATP6/PDH - PDH                               |
| N-acetylaspartic acid                    | 8.239   | 0.00018425 | 3.7346    | 0.0022622  | Control - DLD; Control - MT-ATP6/PDH; PDH - DLD; PDH - MT-ATP6/PDH                        |
| lysine                                   | 7.7264  | 0.00029759 | 3.5264    | 0.0034614  | MT-ATP6/PDH - Control; MT-ATP6/PDH - DLD; MT-ATP6/PDH - PDH                               |
| methionine                               | 6.9562  | 0.00062316 | 3.2054    | 0.0067872  | MT-ATP6/PDH - Control; MT-ATP6/PDH - DLD; MT-ATP6/PDH - PDH                               |
| galactosamine / glucosamine              | 6.921   | 0.00064493 | 3.1905    | 0.0067872  | MT-ATP6/PDH - Control; MT-ATP6/PDH - DLD; MT-ATP6/PDH - PDH                               |
| cytidine                                 | 6.8316  | 0.00070382 | 3.1525    | 0.0070702  | MT-ATP6/PDH - Control; MT-ATP6/PDH - DLD; MT-ATP6/PDH - PDH                               |
| histidine                                | 6.6085  | 0.00087664 | 3.0572    | 0.0084224  | MT-ATP6/PDH - Control; MT-ATP6/PDH - DLD; MT-ATP6/PDH - PDH                               |
| L-cysteic acid                           | 6.5655  | 0.00091465 | 3.0387    | 0.0084224  | MT-ATP6/PDH - Control; MT-ATP6/PDH - DLD; MT-ATP6/PDH - PDH                               |
| pyrroline hydroxycarboxylic acid         | 6.3042  | 0.0011864  | 2.9258    | 0.010293   | Control - MT-ATP6/PDH; PDH - DLD; PDH - MT-ATP6/PDH                                       |
| D-galactonic acid                        | 6.2562  | 0.0012448  | 2.9049    | 0.010293   | DLD - Control; DLD - MT-ATP6/PDH; DLD - PDH                                               |
| thymidine                                | 6.2461  | 0.0012575  | 2.9005    | 0.010293   | DLD - Control; PDH - Control; DLD - MT-ATP6/PDH; PDH - MT-ATP6/PDH                        |
| choline                                  | 6.1696  | 0.0013579  | 2.8671    | 0.010718   | MT-ATP6/PDH - Control; MT-ATP6/PDH - DLD; MT-ATP6/PDH - PDH                               |
| F1P                                      | 6.0835  | 0.001481   | 2.8295    | 0.011286   | DLD - Control; DLD - MT-ATP6/PDH                                                          |
| proline                                  | 5.6016  | 0.0024208  | 2.616     | 0.017833   | DLD - Control; MT-ATP6/PDH - Control; PDH - Control                                       |
| taurine                                  | 5.3747  | 0.0030613  | 2.5141    | 0.021824   | DLD - Control; PDH - Control; DLD - MT-ATP6/PDH; PDH - MT-ATP6/PDH                        |
| 6-phosphogluconic acid                   | 5.202   | 0.0036652  | 2.4359    | 0.025313   | Control - DLD; Control - MT-ATP6/PDH; Control - PDH                                       |
| NADP                                     | 5.1267  | 0.0039663  | 2.4016    | 0.026562   | MT-ATP6/PDH - Control; MT-ATP6/PDH - DLD; MT-ATP6/PDH - PDH                               |
| uric acid                                | 4.9978  | 0.0045425  | 2.3427    | 0.027934   | DLD - Control; MT-ATP6/PDH - Control; MT-ATP6/PDH - PDH                                   |
| phenylalanine                            | 4.9917  | 0.0045714  | 2.3399    | 0.027934   | MT-ATP6/PDH - Control; MT-ATP6/PDH - DLD; MT-ATP6/PDH - PDH                               |
| deoxyinosine                             | 4.981   | 0.0046237  | 2.335     | 0.027934   | DLD - Control; DLD - MT-ATP6/PDH; DLD - PDH                                               |
| D-sedoheptulose-7-phosphate              | 4.9702  | 0.0046767  | 2.3301    | 0.027934   | Control - MT-ATP6/PDH; DLD - MT-ATP6/PDH; PDH - MT-ATP6/PDH                               |
| DOPET                                    | 4.9279  | 0.0048903  | 2.3107    | 0.028441   | MT-ATP6/PDH - Control; MT-ATP6/PDH - DLD; MT-ATP6/PDH - PDH                               |
| cysteine-S-sulfate                       | 4.8891  | 0.0050957  | 2.2928    | 0.028876   | MT-ATP6/PDH - Control; MT-ATP6/PDH - DLD; MT-ATP6/PDH - PDH                               |
| 3- / 7-methylguanine                     | 4.8504  | 0.0053089  | 2.275     | 0.029331   | Control - MT-ATP6/PDH; DLD - MT-ATP6/PDH; PDH - MT-ATP6/PDH                               |
| N-acetylglucosamine 1/6-phosphate        | 4.8231  | 0.0054652  | 2.2624    | 0.029459   | Control - MT-ATP6/PDH; DLD - MT-ATP6/PDH; PDH - MT-ATP6/PDH                               |
| DOPEG                                    | 4.4575  | 0.0080819  | 2.0925    | 0.042526   | MT-ATP6/PDH - DLD; MT-ATP6/PDH - PDH                                                      |
| CDP-choline                              | 4.3847  | 0.0087424  | 2.0584    | 0.044932   | PDH - Control; DLD - MT-ATP6/PDH; PDH - MT-ATP6/PDH                                       |

**Table S3. Related to Related to Fig. 7 and Fig. S7.** Summary of the metabolic pathways analysis for metabolites enriched in day 40 PDH brain organoids. Statistical p values from enrichment analysis are adjusted for multiple hypothesis testing. Total: total number of compounds in the pathway. Hits: matched number from the uploaded data. Raw p: original p value calculated from the enrichment analysis. Holm p: p value adjusted by Holm-Bonferroni method. FDR p: adjusted p value using False Discovery Rate. Impact: pathway impact value calculated from pathway topology analysis.

| Metabolite                        | Total | Expected | Hits | Raw p  | -LOG10(p) | Holm adjust | FDR | Impact |
|-----------------------------------|-------|----------|------|--------|-----------|-------------|-----|--------|
| Pyrimidine metabolism             | 39    | 0.20129  | 2    | 0.0157 | 1.8041    | 1           | 1   | 0.1172 |
| Taurine and hypotaurine metabolis | 8     | 0.04129  | 1    | 0.0406 | 1.391     | 1           | 1   | 0.4286 |
| Vitamin B6 metabolism             | 9     | 0.046452 | 1    | 0.0456 | 1.3408    | 1           | 1   | 0.0784 |
| Pentose phosphate pathway         | 22    | 0.11355  | 1    | 0.1083 | 0.96538   | 1           | 1   | 0.1196 |
| Glycerophospholipid metabolism    | 36    | 0.18581  | 1    | 0.1717 | 0.76513   | 1           | 1   | 0.0193 |
| Arginine and proline metabolism   | 38    | 0.19613  | 1    | 0.1805 | 0.74359   | 1           | 1   | 0.0778 |
| Primary bile acid biosynthesis    | 46    | 0.23742  | 1    | 0.2146 | 0.66836   | 1           | 1   | 0.0076 |
| Aminoacyl-tRNA biosynthesis       | 48    | 0.24774  | 1    | 0.2229 | 0.65181   | 1           | 1   | 0      |

m

**Table S4. Related to Related to Fig. 7 and Fig. S7.** Summary of the metabolic pathways analysis for metabolites enriched in day 40 DLD brain organoids. Statistical p values from enrichment analysis are adjusted for multiple hypothesis testing. Total: total number of compounds in the pathway. Hits: matched number from the uploaded data. Raw p: original p value calculated from the enrichment analysis. Holm p: p value adjusted by Holm-Bonferroni method. FDR p: adjusted p value using False Discovery Rate. Impact: pathway impact value calculated from pathway topology analysis.

| Metabolite                               | Total | Expected | Hits | Raw p   | -LOG10(p) | Holm adjust | FDR   | Impact |
|------------------------------------------|-------|----------|------|---------|-----------|-------------|-------|--------|
| Purine metabolism                        | 65    | 0.62903  | 4    | 0.00271 | 2.5662    | 0.22805     | 0.228 | 0.0059 |
| Pyrimidine metabolism                    | 39    | 0.37742  | 3    | 0.00544 | 2.2645    | 0.45142     | 0.228 | 0.0971 |
| Alanine, aspartate and glutamate metabol | 28    | 0.27097  | 2    | 0.02858 | 1.5439    | 1           | 0.8   | 0.2003 |
| D-Glutamine and D-glutamate metabolism   | 6     | 0.058065 | 1    | 0.05677 | 1.2459    | 1           | 0.916 | 0      |
| Nitrogen metabolism                      | 6     | 0.058065 | 1    | 0.05677 | 1.2459    | 1           | 0.916 | 0      |
| Taurine and hypotaurine metabolism       | 8     | 0.077419 | 1    | 0.07501 | 1.1249    | 1           | 0.916 | 0.4286 |
| Aminoacyl-tRNA biosynthesis              | 48    | 0.46452  | 2    | 0.07632 | 1.1174    | 1           | 0.916 | 0      |
| Arginine biosynthesis                    | 14    | 0.13548  | 1    | 0.12779 | 0.89352   | 1           | 1     | 0      |
| Nicotinate and nicotinamide metabolism   | 15    | 0.14516  | 1    | 0.1363  | 0.86549   | 1           | 1     | 0.1943 |
| Fructose and mannose metabolism          | 20    | 0.19355  | 1    | 0.17774 | 0.75021   | 1           | 1     | 0.0304 |
| Pentose phosphate pathway                | 22    | 0.2129   | 1    | 0.19379 | 0.71267   | 1           | 1     | 0.1196 |
| Glyoxylate and dicarboxylate metabolism  | 32    | 0.30968  | 1    | 0.26974 | 0.56905   | 1           | 1     | 0      |
| Arginine and proline metabolism          | 38    | 0.36774  | 1    | 0.31205 | 0.50578   | 1           | 1     | 0.0778 |
| Tryptophan metabolism                    | 41    | 0.39677  | 1    | 0.33233 | 0.47842   | 1           | 1     | 0.0942 |
| Primary bile acid biosynthesis           | 46    | 0.44516  | 1    | 0.36491 | 0.43782   | 1           | 1     | 0.0076 |

**Table S5. Related to Related to Fig. 7 and Fig. S7.** Summary of the metabolic pathways analysis for metabolites enriched in day 40 MT-ATP6/PDH brain organoids. Statistical p values from enrichment analysis are adjusted for multiple hypothesis testing. Total: total number of compounds in the pathway. Hits: matched number from the uploaded data. Raw p: original p value calculated from the enrichment analysis. Holm p: p value adjusted by Holm-Bonferroni method. FDR p: adjusted p value using False Discovery Rate. Impact: pathway impact value calculated from pathway topology analysis.

| Metabolite                                          | Total | Expected | Hits | Raw p      | -LOG10(p) | Holm adjust | FDR       | Impact  |
|-----------------------------------------------------|-------|----------|------|------------|-----------|-------------|-----------|---------|
| Aminoacyl-tRNA biosynthesis                         | 48    | 0.71226  | 6    | 4.35E-05   | 4.3617    | 0.0036523   | 0.0036523 | 0       |
| Alanine, aspartate and glutamate metabolism         | 28    | 0.41548  | 4    | 0.00059684 | 3.2241    | 0.049538    | 0.025067  | 0.20032 |
| Cysteine and methionine metabolism                  | 33    | 0.48968  | 3    | 0.011653   | 1.9336    | 0.95556     | 0.32629   | 0.10446 |
| Arginine and proline metabolism                     | 38    | 0.56387  | 3    | 0.017166   | 1.7653    | 1           | 0.33051   | 0.13058 |
| Nicotinate and nicotinamide metabolism              | 15    | 0.22258  | 2    | 0.019673   | 1.7061    | 1           | 0.33051   | 0.1943  |
| Citrate cycle (TCA cycle)                           | 20    | 0.29677  | 2    | 0.034034   | 1.4681    | 1           | 0.47648   | 0.04634 |
| Pyruvate metabolism                                 | 22    | 0.32645  | 2    | 0.040643   | 1.391     | 1           | 0.48771   | 0.20684 |
| Glycolysis / Gluconeogenesis                        | 26    | 0.38581  | 2    | 0.055171   | 1.2583    | 1           | 0.54228   | 0.20594 |
| Phenylalanine, tyrosine and tryptophan biosynthesis | 4     | 0.059355 | 1    | 0.058102   | 1.2358    | 1           | 0.54228   | 0.5     |
| Glyoxylate and dicarboxylate metabolism             | 32    | 0.47484  | 2    | 0.079815   | 1.0979    | 1           | 0.55522   | 0       |
| Glycine, serine and threonine metabolism            | 33    | 0.48968  | 2    | 0.084213   | 1.0746    | 1           | 0.55522   | 0       |
| D-Glutamine and D-glutamate metabolism              | 6     | 0.089032 | 1    | 0.085928   | 1.0659    | 1           | 0.55522   | 0       |
| Nitrogen metabolism                                 | 6     | 0.089032 | 1    | 0.085928   | 1.0659    | 1           | 0.55522   | 0       |
| Glycerophospholipid metabolism                      | 36    | 0.53419  | 2    | 0.097841   | 1.0095    | 1           | 0.5848    | 0.02582 |
| Pyrimidine metabolism                               | 39    | 0.57871  | 2    | 0.11206    | 0.95053   | 1           | 0.5848    | 0.03727 |
| Taurine and hypotaurine metabolism                  | 8     | 0.11871  | 1    | 0.11297    | 0.94705   | 1           | 0.5848    | 0       |
| Ubiquinone and other terpenoid-quinone biosynthesis | 9     | 0.13355  | 1    | 0.1262     | 0.89895   | 1           | 0.5848    | 0       |
| Tyrosine metabolism                                 | 42    | 0.62323  | 2    | 0.12681    | 0.89685   | 1           | 0.5848    | 0.13972 |
| Phenylalanine metabolism                            | 10    | 0.14839  | 1    | 0.13924    | 0.85624   | 1           | 0.5848    | 0       |
| Biotin metabolism                                   | 10    | 0.14839  | 1    | 0.13924    | 0.85624   | 1           | 0.5848    | 0       |
| Arginine biosynthesis                               | 14    | 0.20774  | 1    | 0.18957    | 0.72223   | 1           | 0.75827   | 0       |
| Purine metabolism                                   | 65    | 0.96452  | 2    | 0.25062    | 0.60098   | 1           | 0.9489    | 0       |
| Selenocompound metabolism                           | 20    | 0.29677  | 1    | 0.25982    | 0.58533   | 1           | 0.9489    | 0       |
| Pentose phosphate pathway                           | 22    | 0.32645  | 1    | 0.28191    | 0.54989   | 1           | 0.98669   | 0.11955 |
| Lysine degradation                                  | 25    | 0.37097  | 1    | 0.31387    | 0.50324   | 1           | 1         | 0       |
| Glutathione metabolism                              | 28    | 0.41548  | 1    | 0.34447    | 0.46285   | 1           | 1         | 0.0018  |
| Tryptophan metabolism                               | 41    | 0.60839  | 1    | 0.46262    | 0.33477   | 1           | 1         | 0.09417 |



Table S6. Key Resource Table

| REAGENT or RESOURCE                               | SOURCE                    | IDENTIFIER                   |
|---------------------------------------------------|---------------------------|------------------------------|
| <b>ANTIBODIES</b>                                 |                           |                              |
| <b>Primary Antibodies (Immunocytochemistry)</b>   |                           |                              |
| Mouse anti-MAP2 (1:100)                           | Thermo Fisher Scientific  | Cat # 131500, AB_2533001     |
| Rabbit anti-GFAP (1:200)                          | Agilent Technologies      | Cat # Z0334, AB_10013382     |
| Rabbit anti-HOPX (1:2500)                         | Sigma-Aldrich             | Cat # HPA030180, AB_10603770 |
| Mouse anti-mitochondria (1:200)                   | Abcam                     | Cat # ab92824, AB_10562769   |
| Rabbit anti-SOX2 (1:200)                          | Cell Signaling Technology | Cat # 5049S, AB_10828386     |
| Rabbit anti-PAX6 (1:200)                          | Cell Signaling Technology | Cat # 60433, AB_2797599      |
| Mouse anti- $\beta$ 3 TUBULIN (1:100)             | Cell Signaling Technology | Cat # 4466, AB_10270973      |
| Rabbit anti-S100 (1:300)                          | Abcam                     | Cat # ab868, AB_306716       |
| Mouse anti-Olig2 (1:500)                          | Millipore Sigma           | Cat # MABN50, AB_10807410    |
| Rat anti- $\alpha$ TUBULIN (1:500)                | Thermo Fisher Scientific  | Cat # MA180017, AB_2210201   |
| Mouse anti-ZO-1 (1:500)                           | Thermo Fisher Scientific  | Cat # 339100, AB_2533147     |
| Rabbit anti-CDK5RAP2 (1:500)                      | Bethyl Laboratories       | Cat # IHC00063, AB_2076863   |
| Mouse anti-NESTIN (1:100)                         | STEMCELL Technologies     | Cat # 60091, AB_2650581      |
| Chicken anti-TBR2 (1:100)                         | Millipore Sigma           | Cat # AB15894, AB_10615604   |
| Mouse anti-REELIN (1:200)                         | Millipore Sigma           | Cat # MAB5366, AB_2285132    |
| Rat anti-CTIP2 (1:200)                            | Abcam                     | Cat # ab18465, AB_2064130    |
| Rabbit anti-TBR1 (1:200)                          | Abcam                     | Cat # ab31940, AB_2200219    |
| Rabbit anti-TOM20 (1:200)                         | Cell Signaling Technology | Cat # 42406, AB_2687663      |
| Mouse anti-SATB2 (1:100)                          | Abcam                     | Cat # ab51502, AB_882455     |
| Mouse anti-BRN2 (POU3F2) (1:100)                  | Millipore Sigma           | Cat # MABD51, AB_11204531    |
| Mouse anti-CASP (CUX1) (1:100)                    | Abcam                     | Cat # ab54583, AB_941209     |
| Rabbit anti-ALDH1L1 (1:50)                        | Cell Signaling Technology | Cat # 85828S                 |
| <b>Secondary Antibodies (Immunocytochemistry)</b> |                           |                              |
| Goat anti Chicken Alexa Fluor 647 (1:500)         | Thermo Fisher Scientific  | Cat # A-21449, AB_2535866    |
| Goat anti Rat Alexa Fluor 647 (1:500)             | Thermo Fisher Scientific  | Cat # A-21247, AB_2535864    |
| Donkey anti Rabbit Alexa Fluor 647 (1:500)        | Thermo Fisher Scientific  | Cat # A-31573, AB_2536183    |
| Donkey anti Mouse Alexa Fluor 647 (1:500)         | Thermo Fisher Scientific  | Cat # A-31571, AB_162542     |
| Donkey anti Rabbit Alexa Fluor 546 (1:500)        | Thermo Fisher Scientific  | Cat # A-10040, AB_2534016    |
| Donkey anti Mouse Alexa Fluor 546 (1:500)         | Thermo Fisher Scientific  | Cat # A-10036, AB_2534012    |
| Donkey anti Rabbit Alexa Fluor 488 (1:500)        | Thermo Fisher Scientific  | Cat # A-21206, AB_2535792    |
| Donkey anti Mouse Alexa Fluor 488 (1:500)         | Thermo Fisher Scientific  | Cat # A-21202, AB_141607     |

| <b>Primary Antibodies (Western Blotting)</b>                   |                            |                                |
|----------------------------------------------------------------|----------------------------|--------------------------------|
| Rabbit anti-PAX6 (1:300)                                       | Cell Signaling Technology  | Cat # 60433, AB_2797599        |
| Mouse anti-NESTIN (1:500)                                      | STEMCELL Technologies      | Cat # 60091, AB_2650581        |
| Rabbit anti-Sox2 (1:1000)                                      | Cell Signaling Technology  | Cat # 3579, AB_2195767         |
| Mouse anti- $\alpha$ TUBULIN (1:2000)                          | Sigma-Aldrich              | Cat # T9026, AB_477593         |
| <b>Secondary Antibodies -HRP conjugated (Western Blotting)</b> |                            |                                |
| Peroxidase AffiniPure Donkey Anti-Rabbit IgG (H+L) (1:5000)    | Jackson ImmunoResearch Inc | Cat # 711-035-152, AB_10015282 |
| Peroxidase AffiniPure Donkey Anti-Mouse IgG (H+L) (1:5000)     | Jackson ImmunoResearch Inc | Cat # 715-035-151, AB_2340771  |
| <b>CHEMICALS, PEPTIDE, AND RECOMBINANT PROTEINS</b>            |                            |                                |
| Y-27632 Rho/Rock pathway inhibitor                             | STEMCELL Technologies      | Cat # 72307                    |
| Dorsomorphin                                                   | Millipore Sigma            | Cat # P5499                    |
| SB431542                                                       | REPROCELL                  | Cat # 04-0010-10               |
| Etoposide                                                      | Millipore Sigma            | Cat # E1383                    |
| Carbonyl cyanide 3-chlorophenylhydrazone (CCCP)                | Sigma Aldrich              | Cat # C2759                    |
| Nocodazole                                                     | Sigma Aldrich              | Cat # M1404                    |
| Neocarzinostatin                                               | Sigma Aldrich              | Cat # 9162                     |
| <b>CRITICAL COMMERCIAL ASSAYS AND KITS</b>                     |                            |                                |
| PluriTest Assay                                                | Thermo Fisher Scientific   | Cat# A38154                    |
| KaryoStat Assay                                                | Thermo Fisher Scientific   | Cat# A38153                    |
| Mitochondrial DNA sequencing                                   | Girihlet                   |                                |
| Whole Exome sequencing                                         | Genewiz LLC                |                                |
| CytoTune iPS 2.0 Sendai Reprogramming Kit                      | Thermo Fisher Scientific   | Cat # A16517                   |
| STEMdiff Trilineage Differentiation Kit                        | STEMCELL Technologies      | Cat# 05230                     |
| STEMdiff™ SMADi Neural Induction medium                        | STEMCELL Technologies      | Cat# 08581                     |
| NeuroCult™ media                                               | STEMCELL Technologies      | Cat # 05752                    |
| Astrocyte medium                                               | ScienCell                  | Cat # 1801                     |
| STEMdiff™ Cerebral Organoid Kit                                | STEMCELL Technologies      | Cat # 08570                    |
| STEMdiff™ Cerebral Organoid Maturation Kit                     | STEMCELL Technologies      | Cat # 08571                    |
| Seahorse Cell Mito Stress Test                                 | Agilent                    | Cat # 103015-100               |
| Seahorse XF DMEM medium pH 7.4                                 | Agilent                    | Cat#103575-100                 |
| Seahorse XF 1.0 M glucose solution                             | Agilent                    | Cat#103577-100                 |

|                                                                |                                                           |                                                                                                                                                                                                                                                                    |
|----------------------------------------------------------------|-----------------------------------------------------------|--------------------------------------------------------------------------------------------------------------------------------------------------------------------------------------------------------------------------------------------------------------------|
| Seahorse XF 100mM pyruvate solution                            | Agilent                                                   | Cat#103578-100                                                                                                                                                                                                                                                     |
| Seahorse XF 200 mM glutamine solution                          | Agilent                                                   | Cat#103579-100                                                                                                                                                                                                                                                     |
| Seahorse XF calibrant                                          | Agilent                                                   | Cat#100840-000                                                                                                                                                                                                                                                     |
| Seahorse XF96 V3 PS cell culture microplates                   | Agilent                                                   | Cat#101085-004                                                                                                                                                                                                                                                     |
| CellTiter Blue Viability Assay                                 | Promega                                                   | Cat # G8081                                                                                                                                                                                                                                                        |
| <b>DEPOSITED DATA</b>                                          |                                                           |                                                                                                                                                                                                                                                                    |
| Raw and analyzed sequencing data                               | Done by Creative Solutions (J.P.C, Vanderbilt University) | <a href="https://www.ncbi.nlm.nih.gov/sra/PRJNA626388">https://www.ncbi.nlm.nih.gov/sra/PRJNA626388</a><br><a href="https://vandydata.github.io/Rome-ro-Morales-Gama-Leigh-Syndrome-WES/">https://vandydata.github.io/Rome-ro-Morales-Gama-Leigh-Syndrome-WES/</a> |
| <b>EXPERIMENTAL MODELS: CELL LINES</b>                         |                                                           |                                                                                                                                                                                                                                                                    |
| AG16409 control fibroblasts – analyzed for contamination       | Coriell Institute                                         | <a href="https://www.coriell.org/0/Sections/Search/Sample_Detail.aspx?Ref=AG16409&amp;Product=CC">https://www.coriell.org/0/Sections/Search/Sample_Detail.aspx?Ref=AG16409&amp;Product=CC</a>                                                                      |
| GM13411 (MT-ATP6/PDH) fibroblasts – analyzed for contamination | Coriell Institute                                         | <a href="https://www.coriell.org/0/Sections/Search/Sample_Detail.aspx?Ref=GM13411&amp;Product=CC">https://www.coriell.org/0/Sections/Search/Sample_Detail.aspx?Ref=GM13411&amp;Product=CC</a>                                                                      |
| GM03672 (PDH Mutant) fibroblasts – analyzed for contamination  | Coriell Institute                                         | <a href="https://www.coriell.org/0/Sections/Search/Sample_Detail.aspx?Ref=GM03672&amp;Product=CC">https://www.coriell.org/0/Sections/Search/Sample_Detail.aspx?Ref=GM03672&amp;Product=CC</a>                                                                      |
| GM01503 (DLD Mutant) fibroblasts – analyzed for contamination  | Coriell Institute                                         | <a href="https://www.coriell.org/0/Sections/Search/Sample_Detail.aspx?Ref=GM01503&amp;Product=CC">https://www.coriell.org/0/Sections/Search/Sample_Detail.aspx?Ref=GM01503&amp;Product=CC</a>                                                                      |
| <b>SEQUENCE-BASED REAGENTS</b>                                 |                                                           |                                                                                                                                                                                                                                                                    |
| <b>Primers for Trilineage assay</b>                            |                                                           |                                                                                                                                                                                                                                                                    |
| <i>POU5F1</i>                                                  | Integrated DNA Technologies                               | Forward GGGCTCTCCCATGCATTCAAAC<br>Reverse CACCTTCCCTCCAACCGATTGC                                                                                                                                                                                                   |
| <i>NANOG</i>                                                   | Integrated DNA Technologies                               | Forward TGGGATTTACAGGCGTGAGCCAC<br>Reverse AAGCAAAGCCTCCAATCCCAAAC                                                                                                                                                                                                 |
| <i>GAPDH</i>                                                   | Integrated DNA Technologies                               | Harvard Primer Bank, ID: 378404907c2<br>Forward ACAACTTTGGTATCGTGGAAGG<br>Reverse GCCATCACGCCACAGTTTC                                                                                                                                                              |
| <i>GPI</i>                                                     | Integrated DNA Technologies                               | Forward GTGTACCTTCTAGTCCCGCC<br>Reverse GGTC AAGCTGAAGTGTTGAAGC                                                                                                                                                                                                    |
| <i>GATA3</i>                                                   | Integrated DNA Technologies                               | Forward TGGAGGAGGAATGCCAATGGG<br>Reverse GCCGGGTAAACGAGCTGTTCTTG                                                                                                                                                                                                   |

|                                    |                             |                                                                                                           |
|------------------------------------|-----------------------------|-----------------------------------------------------------------------------------------------------------|
| <i>NESTIN</i>                      | Integrated DNA Technologies | Harvard Primer Bank, ID: 38176299c1<br>Forward CTGCTACCCTTGAGACACCTG<br>Reverse GGGCTCTGATCTCTGCATCTAC    |
| <i>PAX6</i>                        | Integrated DNA Technologies | Harvard Primer Bank, ID: 189083679c1<br>Forward TGGGCAGGTATTACGAGACTG<br>Reverse ACTCCCGCTTATACTGGGCTA    |
| <i>CDX2</i>                        | Integrated DNA Technologies | Forward CTGGAGCTGGAGAAGGAGTTTCAC<br>Reverse GACACTTCTCAGAGGACCTGGCTG                                      |
| <i>SOX17</i>                       | Integrated DNA Technologies | Harvard Primer Bank, ID:145275218c1<br>Forward GTGGACCGCACGGAATTTG<br>Reverse GGAGATTCACACCGGAGTCA        |
| <i>TBXT</i>                        | Integrated DNA Technologies | Forward ACAATGCCAGCCCACCTACCAG<br>Reverse CGTACTGGCTGTCCACGATGTCTG                                        |
| <i>NCAM</i>                        | Integrated DNA Technologies | Harvard Primer Bank, ID:316659209c1<br>Forward GGGGTTGCTTGTCAAGTAGC<br>Reverse TTCAGGTTACCAATCGCTGT       |
| <b>Primers for Multipotency</b>    |                             |                                                                                                           |
| <i>S100B</i>                       | Integrated DNA Technologies | Harvard Primer Bank, ID: 114520588c1<br>Forward TGGCCCTCATCGACGTTTTTC<br>Reverse ATGTTCAAAGAACTCGTGGCA    |
| <i>GFAP</i>                        | Integrated DNA Technologies | Reference: (Marton et al., 2019)<br>Forward GGCAAAGCACCAAAGACGG<br>Reverse GGCGGCGTTCCATTTACAAT           |
| <i>O4 (FOXO4)</i>                  | Integrated DNA Technologies | Harvard Primer Bank, ID: 283436081c1<br>Forward GGCTGCCGCGATCATAGAC<br>Reverse GGCTGGTTAGCGATCTCTGG       |
| <i>OLIG2</i>                       | Integrated DNA Technologies | Reference: (Marton et al., 2019)<br>Forward AAGGCAGTTGCTGTGGAAC<br>Reverse GCAAACAGCTTAGCATTGCG           |
| <i>TUBB3</i>                       | Integrated DNA Technologies | Harvard Primer Bank, ID: 308235961c1<br>Forward GGCCAAGGGTCACTACACG<br>Reverse GCAGTCGCAGTTTTCACTC        |
| <i>MAP2</i>                        | Integrated DNA Technologies | Harvard Primer Bank, ID: 87578393c1<br>Forward CTCAGCACCGCTAACAGAGG<br>Reverse CATTGGCGCTTCGGACAAG        |
| <b>Primers for Brain Organoids</b> |                             |                                                                                                           |
| <i>Reelin</i>                      | Integrated DNA Technologies | Harvard Primer Bank, ID: 223718142c2<br>Forward ACATCTACAAGTGTTTCAGGCATC<br>Reverse TGGTTACCAAAGTGGTGGTCA |
| <i>HOPX</i>                        | Integrated DNA Technologies | Harvard Primer Bank, ID: 21311737a1<br>Forward GAGACCCAGGGTAGTGATTTGA<br>Reverse AAAAGTAATCGAAAGCCAAGCAC  |
| <i>CTIP2 (BCL11B)</i>              | Integrated DNA Technologies | Harvard Primer Bank, ID: 12597634c2<br>Forward TCCAGCTACATTTGCACAACA<br>Reverse GCTCCAGGTAGATGCGGAAG      |

|                                |                             |                                                                                                                                                                     |
|--------------------------------|-----------------------------|---------------------------------------------------------------------------------------------------------------------------------------------------------------------|
| <i>TBR2 (EOMES)</i>            | Integrated DNA Technologies | Harvard Primer Bank, ID: 22538469c2<br>Forward GTGCCACGTCTACCTGTG<br>Reverse CCTGCCCTGTTTCGTAATGAT                                                                  |
| <i>TBR1</i>                    | Integrated DNA Technologies | Harvard Primer Bank, ID: 22547231c1<br>Forward GCAGCAGCTACCCACATTCA<br>Reverse AGGTTGTCAGTGGTTCGAGATA                                                               |
| <i>SOX2</i>                    | Integrated DNA Technologies | Forward CCATGCAGGTTGACACCGTTG<br>Reverse TCGGCAGACTGATTCAAATAATACAG                                                                                                 |
| <i>SATB2</i>                   | Integrated DNA Technologies | Harvard Primer Bank, ID: 289547595c2<br>Forward GACAGTGGCCGACATGCTAC<br>Reverse AGGCAAGTCTTCCAACCTTTGAA                                                             |
| <i>BRN2 (POU3F2)</i>           | Integrated DNA Technologies | Harvard Primer Bank, ID: 380254475c1<br>Forward CGGCGGATCAAACCTGGGATTT<br>Reverse TTGCGCTGCGATCTTGTCTAT                                                             |
| <i>CUX1</i>                    | Integrated DNA Technologies | Harvard Primer Bank, ID: 321400113c1<br>Forward GAAGAACCAAGCCGAAACCAT<br>Reverse AGGCTCTGAACCTTATGCTCA                                                              |
| <i>VIMENTIN</i>                | Integrated DNA Technologies | Harvard Primer Bank, ID: 240849334c2<br>Forward AGTCCACTGAGTACCGGAGAC<br>Reverse CATTTCACGCATCTGGCGTTC                                                              |
| <i>SOX9</i>                    | Integrated DNA Technologies | Harvard Primer Bank, ID: 182765453c1<br>Forward AGCGAACGCACATCAAGAC<br>Reverse CTGTAGGCGATCTGTTGGGG                                                                 |
| <i>ALDH1L1</i>                 | Integrated DNA Technologies | Harvard Primer Bank, ID: 21614512c3<br>Forward TCCAGACCTTCCGCTACTTTG<br>Reverse CAGGGGATAGTTCCAGGGGAT                                                               |
|                                |                             |                                                                                                                                                                     |
| <b>Housekeeping primers</b>    |                             |                                                                                                                                                                     |
| GAPDH                          | Integrated DNA Technologies | Harvard Primer Bank, ID: 378404907c2<br>Forward ACAACTTTGGTATCGTGGAAGG<br>Reverse GCCATCACGCCACAGTTTC                                                               |
| GPI (F1/R1)                    | Integrated DNA Technologies | Forward GTGTACCTTCTAGTCCC GCC<br>Reverse GGTCAAGCTGAAGTGGTTGAAGC                                                                                                    |
|                                |                             |                                                                                                                                                                     |
| <b>SOFTWARE AND ALGORITHMS</b> |                             |                                                                                                                                                                     |
| Image Studio™ Lite             | LI-COR                      | <a href="https://www.licor.com/bio/image-studio-lite/download">https://www.licor.com/bio/image-studio-lite/download</a>                                             |
| Fiji                           | Schindelin et al., 2012     | <a href="https://imagej.net/Fiji">https://imagej.net/Fiji</a>                                                                                                       |
| GraphPad Prism v8.1.2          | GraphPad                    | <a href="https://www.graphpad.com/scientific-software/prism/">https://www.graphpad.com/scientific-software/prism/</a>                                               |
| NIS-Elements                   | Nikon Instruments           | <a href="https://www.microscope.healthcare.nikon.com/products/software/nis-elements">https://www.microscope.healthcare.nikon.com/products/software/nis-elements</a> |

|                              |                                                                                                                                                        |                                                                                                                                                                                                                                                                                         |
|------------------------------|--------------------------------------------------------------------------------------------------------------------------------------------------------|-----------------------------------------------------------------------------------------------------------------------------------------------------------------------------------------------------------------------------------------------------------------------------------------|
| MetaboAnalyst 5.0            | (Chong and Xia, 2018; Chong et al., 2018; Chong et al., 2019; Xia and Wishart, 2010; Xia and Wishart, 2011a; Xia and Wishart, 2011b; Xia et al., 2009) | <a href="https://www.metaboanalyst.ca/home.xhtml">https://www.metaboanalyst.ca/home.xhtml</a>                                                                                                                                                                                           |
| Snpsift                      | (Cingolani et al., 2012)                                                                                                                               | <a href="http://snpeff.sourceforge.net/SnpSift.html">http://snpeff.sourceforge.net/SnpSift.html</a>                                                                                                                                                                                     |
| R 3.5.3                      | R Foundation                                                                                                                                           | <a href="https://www.r-project.org/">https://www.r-project.org/</a>                                                                                                                                                                                                                     |
| BioCircos                    | (Cui et al., 2016)                                                                                                                                     | <a href="https://cran.r-project.org/web/packages/BioCircos/index.html">https://cran.r-project.org/web/packages/BioCircos/index.html</a>                                                                                                                                                 |
| Seahorse Wave                | Agilent                                                                                                                                                | <a href="https://www.agilent.com/en/product/cell-analysis/real-time-cell-metabolic-analysis/xf-software/seahorse-wave-desktop-software-740897">https://www.agilent.com/en/product/cell-analysis/real-time-cell-metabolic-analysis/xf-software/seahorse-wave-desktop-software-740897</a> |
| <b>OTHER</b>                 |                                                                                                                                                        |                                                                                                                                                                                                                                                                                         |
| Mitotracker Red CMXRos       | Fisher Scientific                                                                                                                                      | Cat # M7512                                                                                                                                                                                                                                                                             |
| Matrigel™                    | Corning                                                                                                                                                | Cat # 354277                                                                                                                                                                                                                                                                            |
| Gentle dissociation solution | STEMCELL Technologies                                                                                                                                  | Cat # 07174                                                                                                                                                                                                                                                                             |
| Seahorse XFe96 Analyzer      | Agilent                                                                                                                                                | N/A                                                                                                                                                                                                                                                                                     |
| AggreWell™ 800 24-well plate | STEMCELL Technologies                                                                                                                                  | Cat # 34815                                                                                                                                                                                                                                                                             |
| AggreWell™ Rinsing Solution  | STEMCELL Technologies                                                                                                                                  | Cat # 07010                                                                                                                                                                                                                                                                             |
| Human Fetal Brain Total RNA  | Takara Bio                                                                                                                                             | Cat # 636526                                                                                                                                                                                                                                                                            |
